# Supplementary material for: The bimetallic and the anchoring group effects on both optical and charge transport properties of hexaphyrin amethyrin
Source: Royal Society of Chemistry journal article supplement (doi:10.1039/d1nj00091h), 2021-01-01
Supplement: d1nj00091h1.pdf [file d1nj00091h1.pdf]

# Supplementary Information

## The Bimetallic and the Anchoring Group Effects on both the Optical and Charge Transport Properties of the Hexaphyrin Amethyrin

Merlys Borges-Martínez<sup>a\*</sup>, Nicolás Montenegro-Pohlhammer<sup>a,\*</sup>,

Gloria Cárdenas-Jirón<sup>a\*</sup>

<sup>a</sup>Laboratory of Theoretical Chemistry, Faculty of Chemistry and Biology,  
University of Santiago de Chile (USACH), 9170022, Santiago, Chile.

\*Author to whom the correspondence should be addressed

Email: [merlys.borges@usach.cl](mailto:merlys.borges@usach.cl); [nicolas.montenegro.p@usach.cl](mailto:nicolas.montenegro.p@usach.cl); [gloria.cardenas@usach.cl](mailto:gloria.cardenas@usach.cl)

### Table of Contents

|                                                                                                                                                                                                                                                                       |    |
|-----------------------------------------------------------------------------------------------------------------------------------------------------------------------------------------------------------------------------------------------------------------------|----|
| <b>Figure S1a.</b> Optimized molecular structures calculated at the BP86-D3/def2-TZVP level of theory                                                                                                                                                                 | 2  |
| <b>Figure S1b.</b> Comparison of the optimized molecular structures and the RMSD (Å) for the macrocycle between them obtained at the BP86-D3/def2-TZVP level of theory. For simplicity, the metal atoms and substituents of macrocycles have not been included.....   | 3  |
| <b>Figure S2.</b> Surface of the frontier molecular orbitals.....                                                                                                                                                                                                     | 4  |
| <b>Figure S2.1.</b> Surface of the frontier molecular orbitals for the singlet state of FB-amethyrin computed with the PWB95-D3/def2-TZVP level of theory (energy in eV).....                                                                                         | 4  |
| <b>Figure S2.2.</b> Surface of the frontier molecular orbitals for the singlet state of Zn(II)-amethyrin computed with the PWB95-D3/def2-TZVP level of theory (energy in eV).....                                                                                     | 5  |
| <b>Figure S2.3.</b> Surface of the frontier molecular orbitals for the singlet state of Cu(II)-amethyrin computed with the PWB95-D3/def2-TZVP level of theory (energy in eV).....                                                                                     | 6  |
| <b>Figure S2.4.</b> Surface of the frontier molecular orbitals for the triplet state of Cu(II)-amethyrin computed with the PWB95-D3/def2-TZVP level of theory (energy in eV).....                                                                                     | 7  |
| <b>Figure S2.5.</b> Surface of the molecular orbitals involved in the absorption bands computed for BF-, Zn(II)- and Cu(II)-amethyrin with the TPSSH/def2-TZVP level of theory in the solution phase (chloroform) (energy in eV). .....                               | 8  |
| <b>Figure S3.</b> UV-Vis absorption spectra of a) FB-, Zn- and Cu- amethyrin with ethyl as an anchoring group (Q bands were plotted as bars) and b) Cu-amethyrin with different anchoring groups calculated at the TPSSH/de2-TZVP level of theory in chloroform. .... | 13 |
| <b>Figure S4.</b> Molecular orbitals-based analysis for free-base-Amethyrin with Spin Degenerate Channels (all energy values are relative to the system's Fermi level).....                                                                                           | 13 |
| <b>Figure S5.</b> Molecular orbitals-based analysis for Zn(II)-Amethyrin with Spin Degenerate Channels (all energy values are relative to the system's Fermi level).....                                                                                              | 14 |
| <b>Figure S6.</b> Transmission Spectra and Projected Density of States for Cu(II)-Amethyrin.....                                                                                                                                                                      | 15 |
| <b>Figure S7.</b> Molecular orbitals-based analysis for Cu(II)-Amethyrin (all energy values are relative to the system's Fermi level) .....                                                                                                                           | 16 |
| <b>Figure S8.</b> Calculated spin resolved current on the Cu(II)-Amethyrin junctions.....                                                                                                                                                                             | 24 |
| <b>Figure S9.</b> Calculated total current on the Cu(II)-Amethyrin junctions .....                                                                                                                                                                                    | 24 |
| <b>Table S1.</b> Cartesian coordinates of the optimized structures for amethyrins in the ground state.....                                                                                                                                                            | 25 |

**Figure S1a.** Optimized molecular structures calculated at the BP86-D3/def2-TZVP level of theory

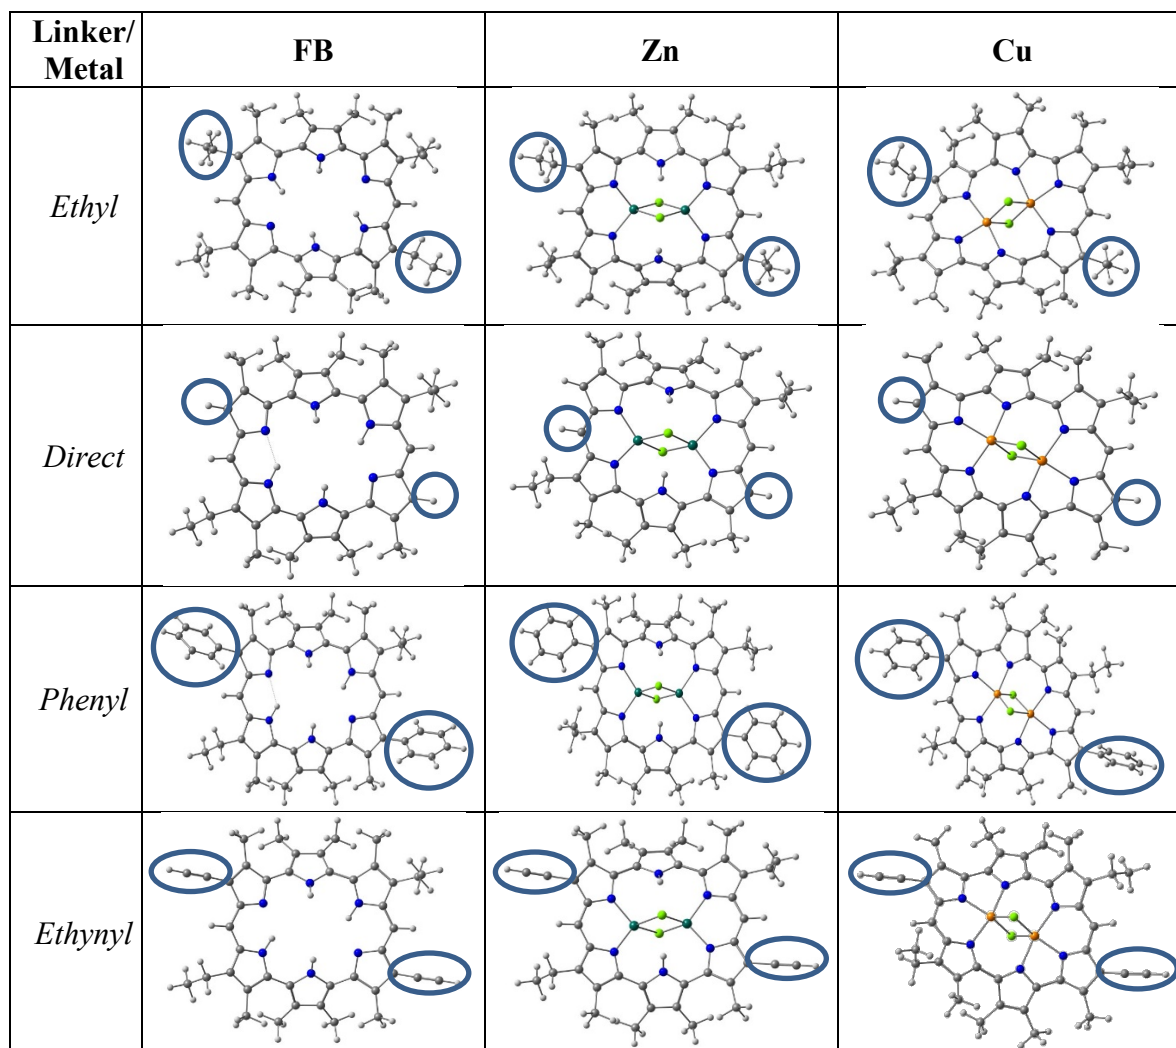

**Figure S1b.** Comparison of the optimized molecular structures and the RMSD (Å) for the macrocycle between them obtained at the BP86-D3/def2-TZVP level of theory. For simplicity, the metal atoms and substituents of macrocycles have not been included.

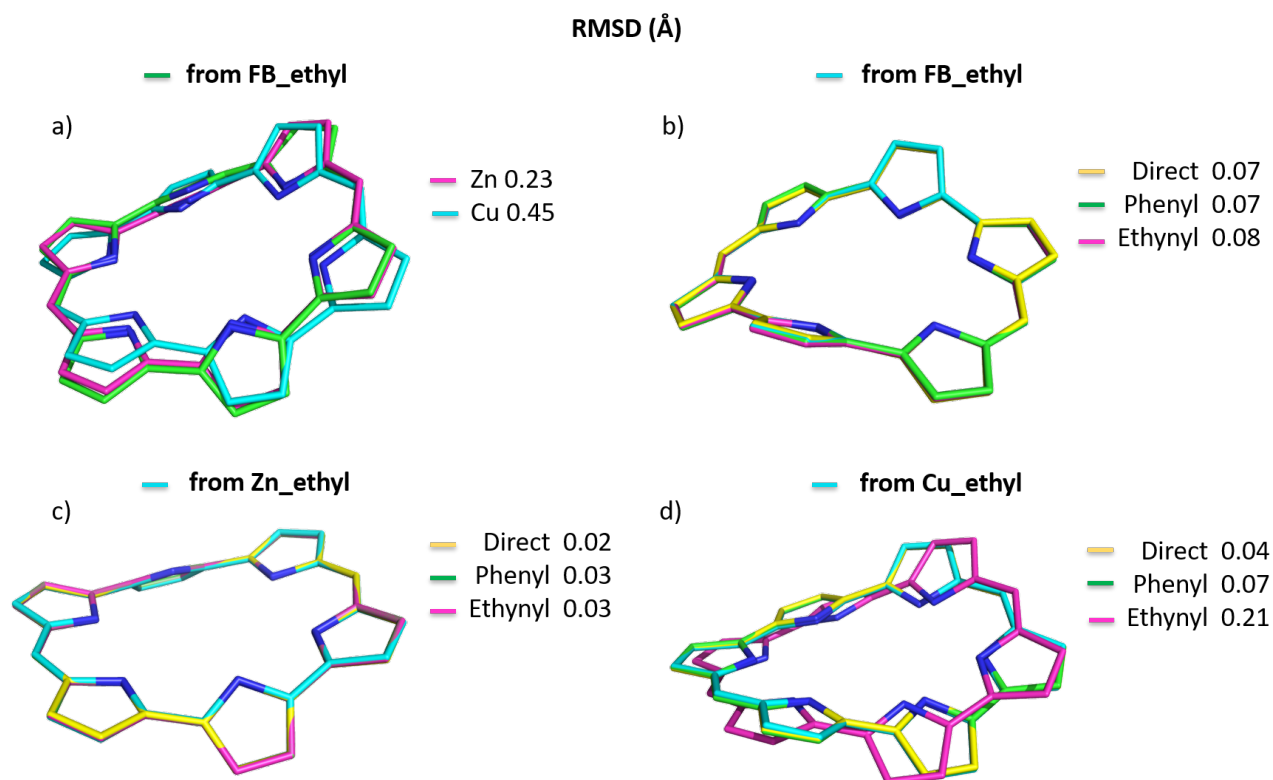

**Figure S2.** Surface of the frontier molecular orbitals

**Figure S2.1.** Surface of the frontier molecular orbitals for the singlet state of FB-amethyrin computed with the PWBP95-D3/def2-TZVP level of theory (energy in eV)

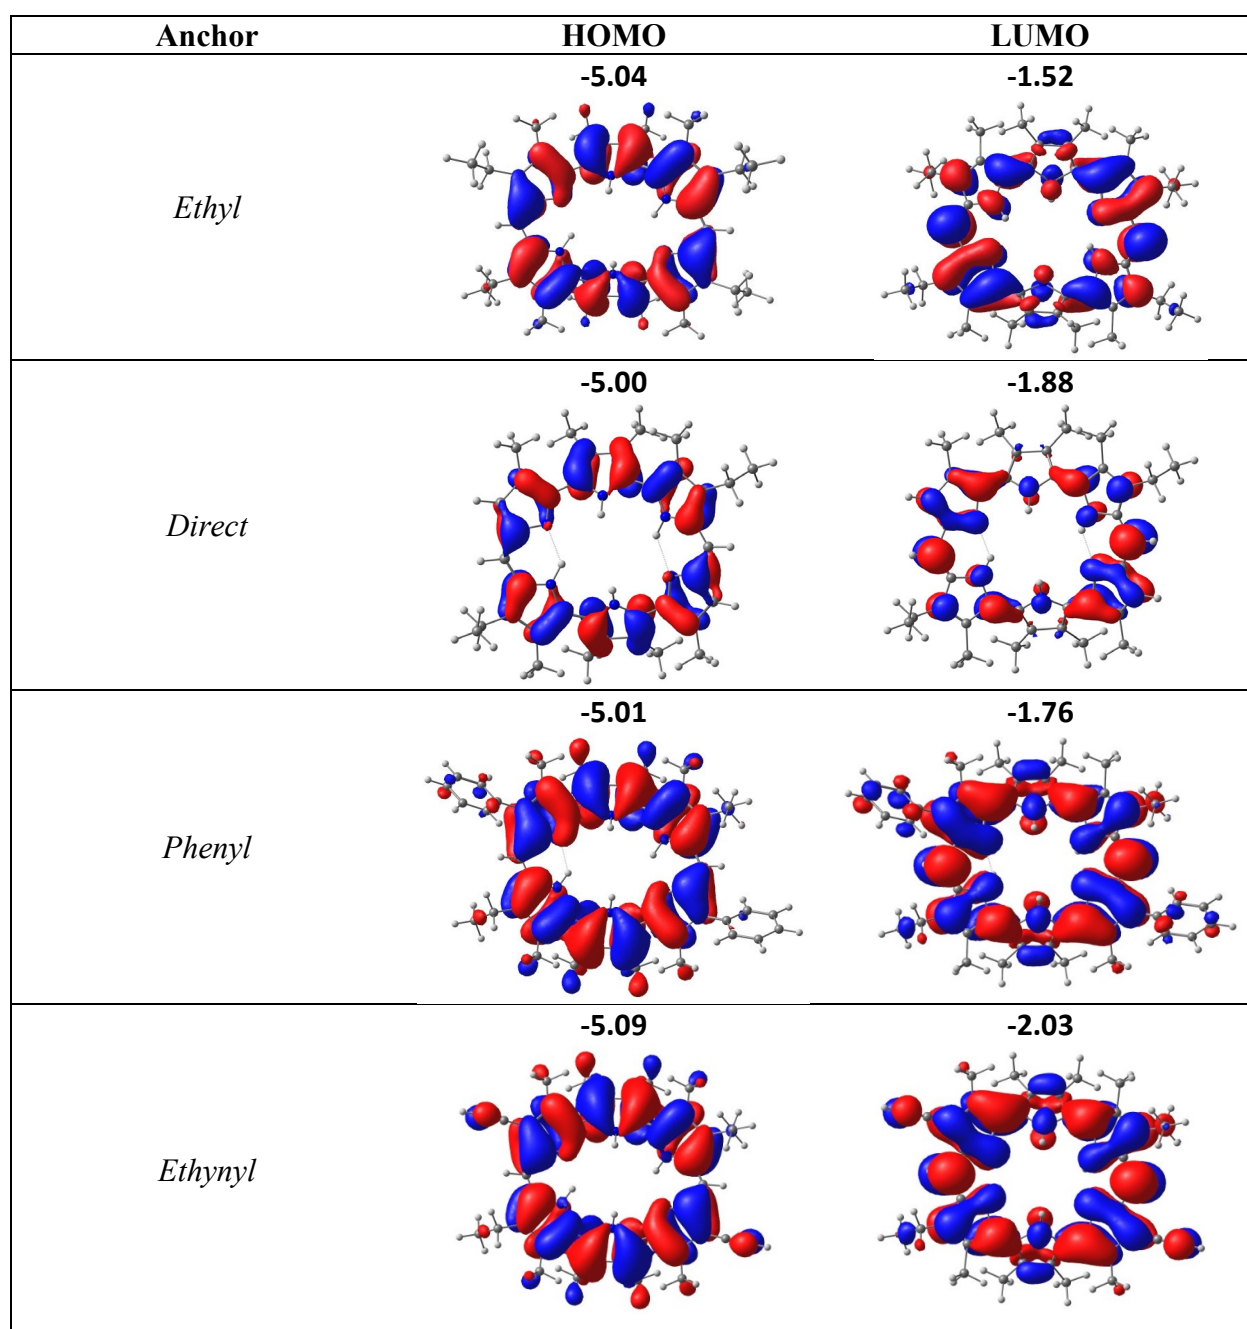



**Figure S2.2.** Surface of the frontier molecular orbitals for the singlet state of Zn(II)-amethyryn computed with the PWBP95-D3/def2-TZVP level of theory (energy in eV)

| <b>Anchor</b>  | <b>HOMO</b>                                                                                         | <b>LUMO</b>                                                                                           |
|----------------|-----------------------------------------------------------------------------------------------------|-------------------------------------------------------------------------------------------------------|
| <i>Ethyl</i>   | <b>-5.08</b><br>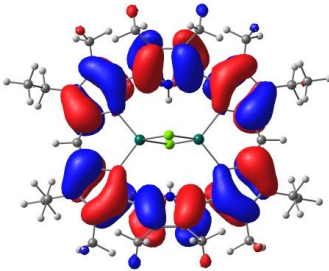   | <b>-1.86</b><br>   |
| <i>Direct</i>  | <b>-5.18</b><br>   | <b>-2.00</b><br>   |
| <i>Phenyl</i>  | <b>-5.14</b><br> | <b>-1.93</b><br>  |
| <i>Ethynyl</i> | <b>-5.28</b><br> | <b>-2.14</b><br> |

**Figure S2.3.** Surface of the frontier molecular orbitals for the singlet state of Cu(II)-amethyryn computed with the PWBP95-D3/def2-TZVP level of theory (energy in eV)

| <b>Anchor</b>  | <b>HOMO</b>                                                                                         | <b>LUMO</b>                                                                                           |
|----------------|-----------------------------------------------------------------------------------------------------|-------------------------------------------------------------------------------------------------------|
| <i>Ethyl</i>   | <b>-5.26</b><br>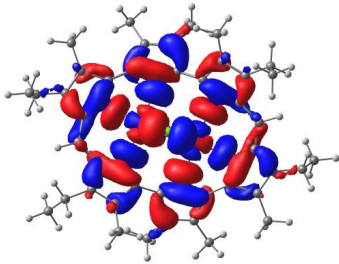   | <b>-3.00</b><br>   |
| <i>Direct</i>  | <b>-5.47</b><br>   | <b>-3.19</b><br>   |
| <i>Phenyl</i>  | <b>-5.37</b><br>  | <b>-3.09</b><br>   |
| <i>Ethynyl</i> | <b>-5.52</b><br> | <b>-3.28</b><br> |

**Figure S2.4.** Surface of the frontier molecular orbitals for the triplet state of Cu(II)-amethyryn computed with the PWBP95-D3/def2-TZVP level of theory (energy in eV)

| Anchor         | SOMO                                                                                         |                                                                                               | LUMO                                                                                           |
|----------------|----------------------------------------------------------------------------------------------|-----------------------------------------------------------------------------------------------|------------------------------------------------------------------------------------------------|
| <i>Ethyl</i>   | -5.53<br>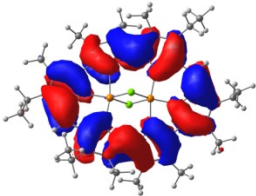   | -5.52<br>   | -2.75<br>   |
| <i>Direct</i>  | -5.70<br>   | -5.69<br>   | -2.94<br>   |
| <i>Phenyl</i>  | -5.62<br>  | -5.62<br>  | -2.82<br>  |
| <i>Ethynyl</i> | -5.73<br> | -5.72<br> | -2.99<br> |

**Figure S2.5.** Surface of the molecular orbitals involved in the absorption bands computed for BF-, Zn(II)- and Cu(II)-amethyrin with the TPSSh/def2-TZVP level of theory in the solution phase (chloroform) (energy in eV).

| System/<br>Anchor | $\lambda/\text{nm}$ (E/eV) <i>f</i> | Assignment | Transition                                                                                      |   |                                                                                                  |
|-------------------|-------------------------------------|------------|-------------------------------------------------------------------------------------------------|---|--------------------------------------------------------------------------------------------------|
| Ethyl             |                                     |            |                                                                                                 |   |                                                                                                  |
| FB                | 601 (2.06) 0.208                    | Q          | H<br>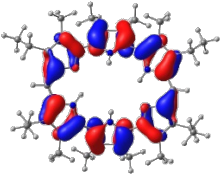         | → | L+1<br>       |
|                   | 493 (2.52) 1.225                    | Soret      | NTO occ<br>   | → | NTO virt<br>  |
| Zn                | 642 (1.93) 0.169                    | Q          | H<br>        | → | L+1<br>      |
|                   | 499 (2.48) 0.306                    | Q          | H-2<br>     | → | L<br>       |
|                   | 475 (2.61) 0.968                    | Soret      | NTO occ<br> | → | NTO vir<br> |
| Cu                | 885 (1.40) 0.080                    | Q          | H-1<br>     | → | L+1<br>     |
|                   | 766 (1.62) 0.091                    | Q          | H-2<br>     | → | L+1<br>     |

|        |                  |       |                    |   |             |
|--------|------------------|-------|--------------------|---|-------------|
|        |                  |       |                    |   |             |
|        | 491 (2.53) 0.530 | Soret | NTO occ<br>        | → | NTO vir<br> |
| Direct |                  |       |                    |   |             |
| FB     | 640 (1.94) 0.190 | Q     | H<br>              | → | L+1<br>     |
|        | 509 (2.44) 0.420 | Q     | H-1<br><br>H-2<br> | → | L<br>       |
|        | 458 (2.71) 1.258 | Soret | NTO occ<br>        | → | NTO vir<br> |
| Zn     | 647 (1.91) 0.175 | Q     | H<br>              | → | L+1<br>     |
|        | 508 (2.44) 0.307 | Q     | H-2<br>            | → | L<br>       |
|        | 479 (2.59) 1.022 | Soret | NTO occ<br>        | → | NTO vir<br> |



|        |                  |       |                                                                                                                                                                                            |   |                                                                                                  |
|--------|------------------|-------|--------------------------------------------------------------------------------------------------------------------------------------------------------------------------------------------|---|--------------------------------------------------------------------------------------------------|
|        |                  |       | 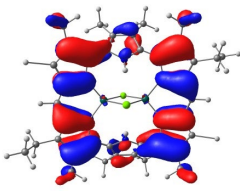                                                                                                         |   |               |
| Cu     | 874 (1.48) 0.152 | Q     | H-1<br>                                                                                                  | → | L+1<br>       |
|        | 776 (1.60) 0.090 | Q     | H-2<br>                                                                                                  | → | L+1<br>       |
|        | 493 (2.51) 0.493 | Soret | NTO occ<br>                                                                                             | → | NTO vir<br>  |
| Phenyl |                  |       |                                                                                                                                                                                            |   |                                                                                                  |
| FB     | 652 (1.90) 0.219 | Q     | H<br>                                                                                                  | → | L+1<br>     |
|        | 518 (2.39) 0.232 | Q     | H-1<br><br>H-2<br> | → | L<br>       |
|        | 462 (2.68) 0.993 | Soret | NTO occ<br>                                                                                            | → | NTO vir<br> |
| Zn     | 657 (1.89) 0.199 | Q     | H-2<br>                                                                                                | → | L+1<br>     |



|         |                  |       |                                                                                                    |   |                                                                                                  |
|---------|------------------|-------|----------------------------------------------------------------------------------------------------|---|--------------------------------------------------------------------------------------------------|
|         |                  |       | 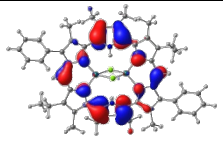                 |   |               |
|         | 510 (2.43) 0.268 | Q     | H-2<br>          | → | L<br>         |
|         | 484 (2.56) 0.782 | Soret | NTO occ<br>      | → | NTO vir<br>   |
| Cu      | 898 (1.38) 0.126 | Q     | H-1<br>          | → | L+1<br>       |
|         | 779 (1.59) 0.060 | Q     | H-2<br>         | → | L+1<br>      |
|         | 764 (1.62) 0.041 | Q     | H-2<br>        | → | L+1<br>     |
|         | 495 (2.50) 0.373 | Soret | NTO occ<br>    | → | NTO vir<br> |
| Ethynyl |                  |       |                                                                                                    |   |                                                                                                  |
| FB      | 698 (1.78) 0.231 | Q     | H<br>          | → | L+1<br>     |
|         | 538 (2.30) 0.103 | Q     | H-1<br><br>H-2 | → | L<br>       |

|    |                  |       |                                                                                                 |   |                                                                                                  |
|----|------------------|-------|-------------------------------------------------------------------------------------------------|---|--------------------------------------------------------------------------------------------------|
|    |                  |       | 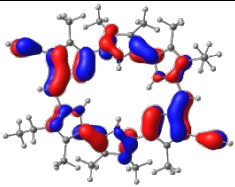              |   |                                                                                                  |
|    | 478 (2.59) 1.025 | Soret | NTO occ<br>   | → | NTO vir<br>   |
| Zn | 672 (1.85) 0.218 | Q     | H<br>          | → | L+1<br>       |
|    | 520 (2.38) 0.221 | Q     | H-2<br>       | → | L<br>         |
|    | 481 (2.58) 1.157 | Soret | NTO occ<br> | → | NTO vir<br> |
| Cu | 909 (1.36) 0.121 | Q     | H-1<br>      | → | L+1<br>     |
|    | 780 (1.59) 0.088 | Q     | H-2<br>      | → | L+1<br>     |
|    | 505 (2.46) 0.589 | Soret | NTO occ<br> | → | NTO vir<br> |

**Figure S3.** UV-Vis absorption spectra of a) FB-, Zn- and Cu- amethyrin with ethyl as an anchoring group (Q bands were plotted as bars) and b) Cu-amethyrin with different anchoring groups calculated at the TPSSh/de2-TZVP level of theory in chloroform.

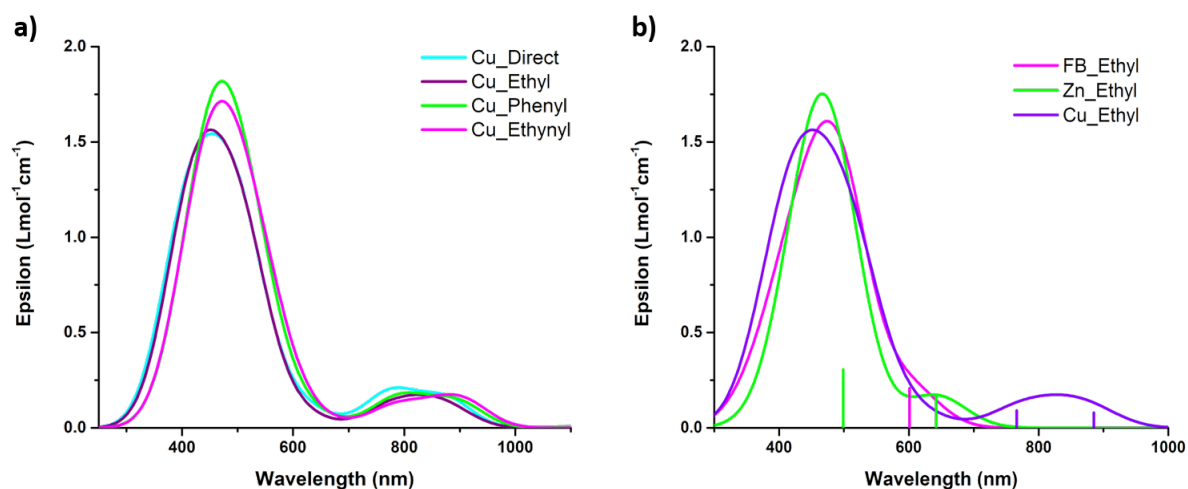

**Figure S4.** Molecular orbitals-based analysis for free-base-Amethyrin with Spin Degenerate Channels (all energy values are relative to the system's Fermi level)

|                                             |                            |
|---------------------------------------------|----------------------------|
| <b>Ethyl anchor</b>                         |                            |
|                                             |                            |
| Spin Up/Down Transmission function -0.27 eV | Spin Up/Down HOMO -0.28 eV |
| <b>Phenyl anchor</b>                        |                            |
|                                             |                            |
| Spin Up/Down Transmission function -0.22 eV | Spin Up/Down HOMO -0.44 eV |
| <b>Ethynyl anchor</b>                       |                            |
|                                             |                            |
| Spin Up/Down Transmission function -0.22 eV | Spin Up/Down HOMO -0.44 eV |

|                                                                                   |                                                                                    |
|-----------------------------------------------------------------------------------|------------------------------------------------------------------------------------|
| <b>Direct anchor</b>                                                              |                                                                                    |
| 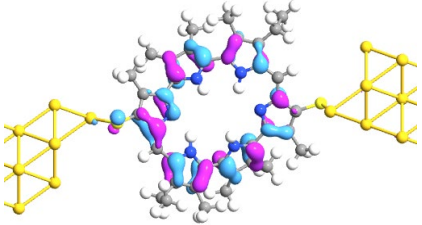 |  |
| Spin Up/Down Transmission function -0.23 eV                                       | Spin Up/Down HOMO -0.28 eV                                                         |

**Figure S5.** Molecular orbitals-based analysis for Zn(II)-Amethyrin with Spin Degenerate Channels (all energy values are relative to the system's Fermi level)

|                                                                                     |                                                                                      |
|-------------------------------------------------------------------------------------|--------------------------------------------------------------------------------------|
| <b>Ethyl anchor</b>                                                                 |                                                                                      |
| 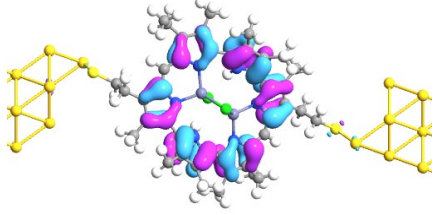  |   |
| Spin Up/Down Transmission function -0.28 eV                                         | Spin Up/Down HOMO -0.28 eV                                                           |
| <b>Phenyl anchor</b>                                                                |                                                                                      |
|  |  |
| Spin Up/Down Transmission function -0.26 eV                                         | Spin Up/Down HOMO -0.27 eV                                                           |
| <b>Ethynyl anchor</b>                                                               |                                                                                      |
|  |  |
| Spin Up/Down Transmission function -0.25 eV                                         | Spin Up/Down HOMO -0.30 eV                                                           |
| <b>Direct anchor</b>                                                                |                                                                                      |

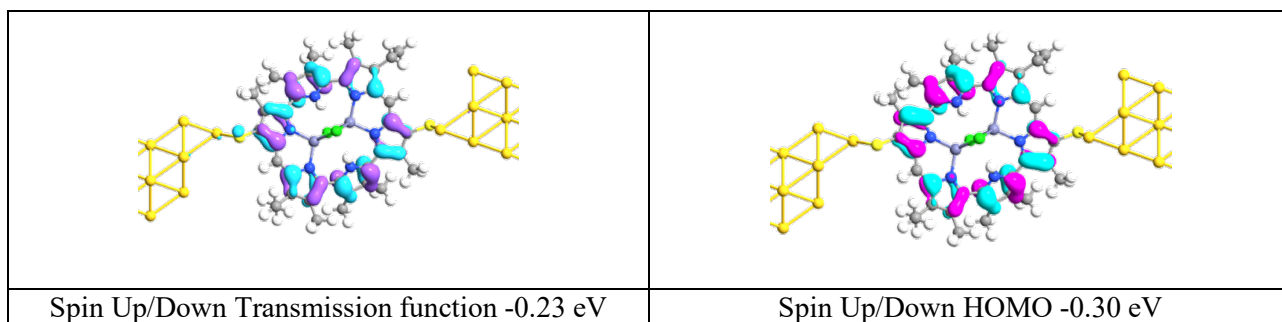

**Figure S6.** Transmission Spectra and Projected Density of States for Cu(II)-Amethyrin

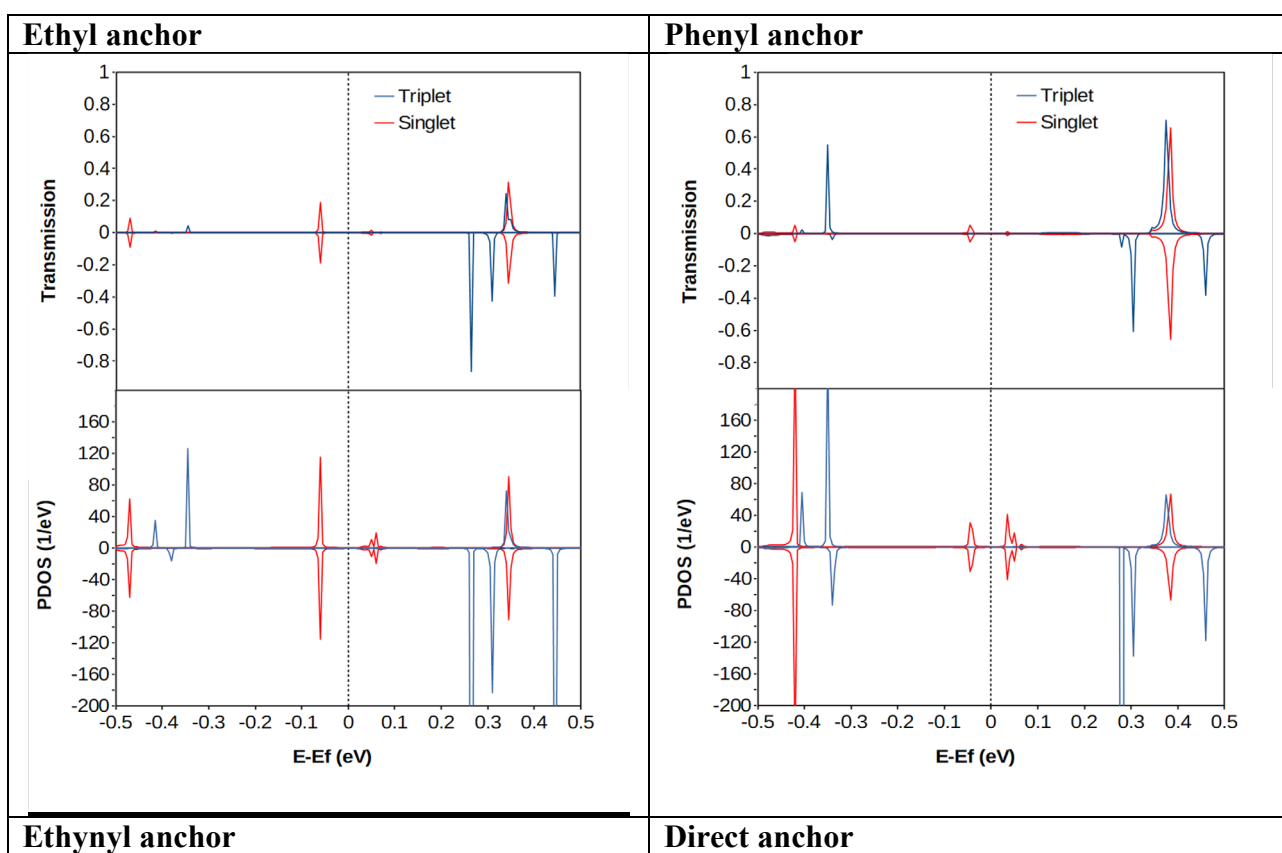



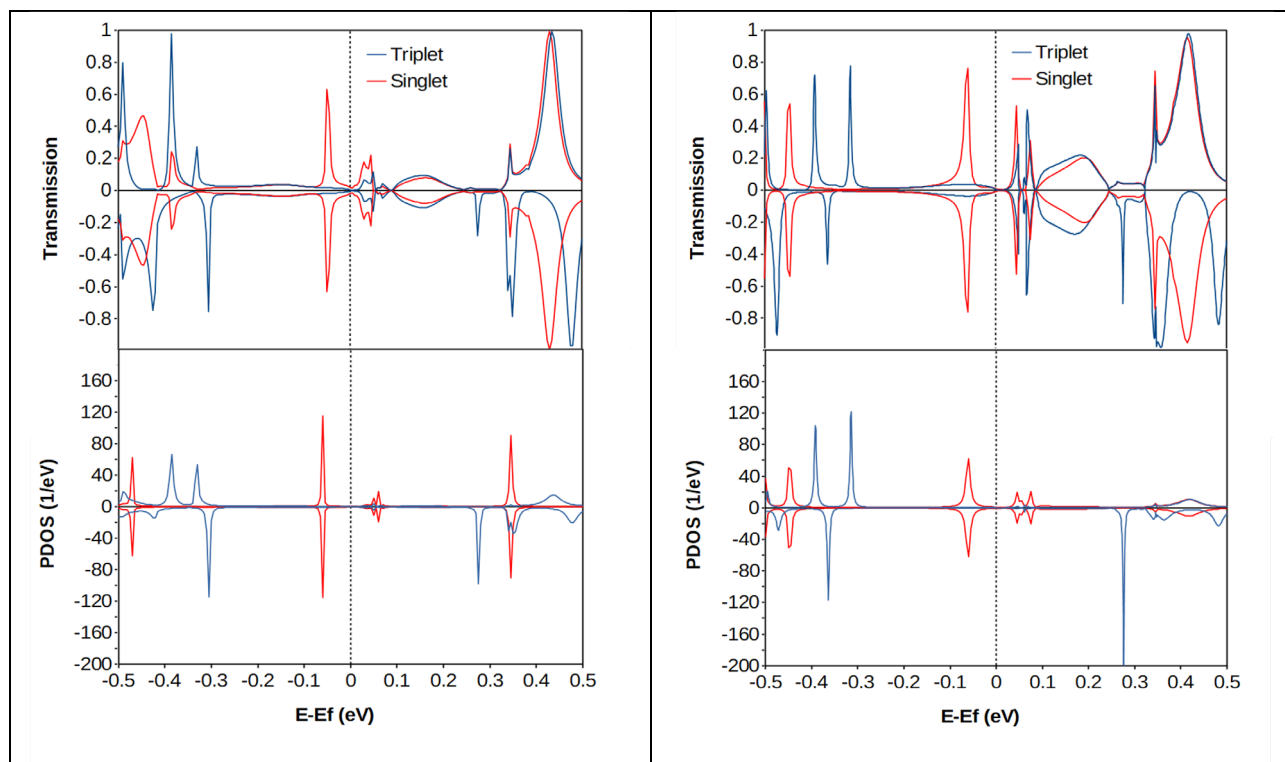

**Figure S7.** Molecular orbitals-based analysis for Cu(II)-Amethyrin (all energy values are relative to the system's Fermi level)

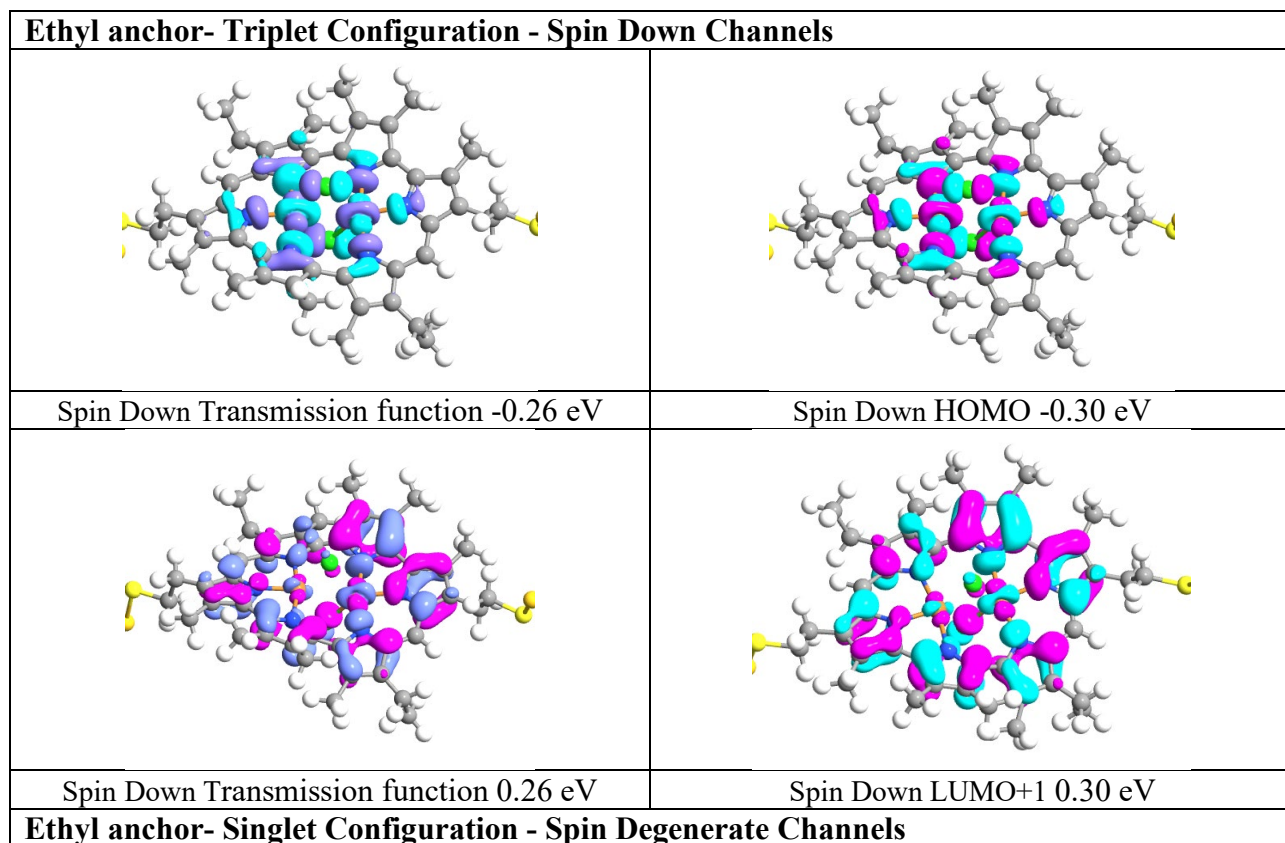



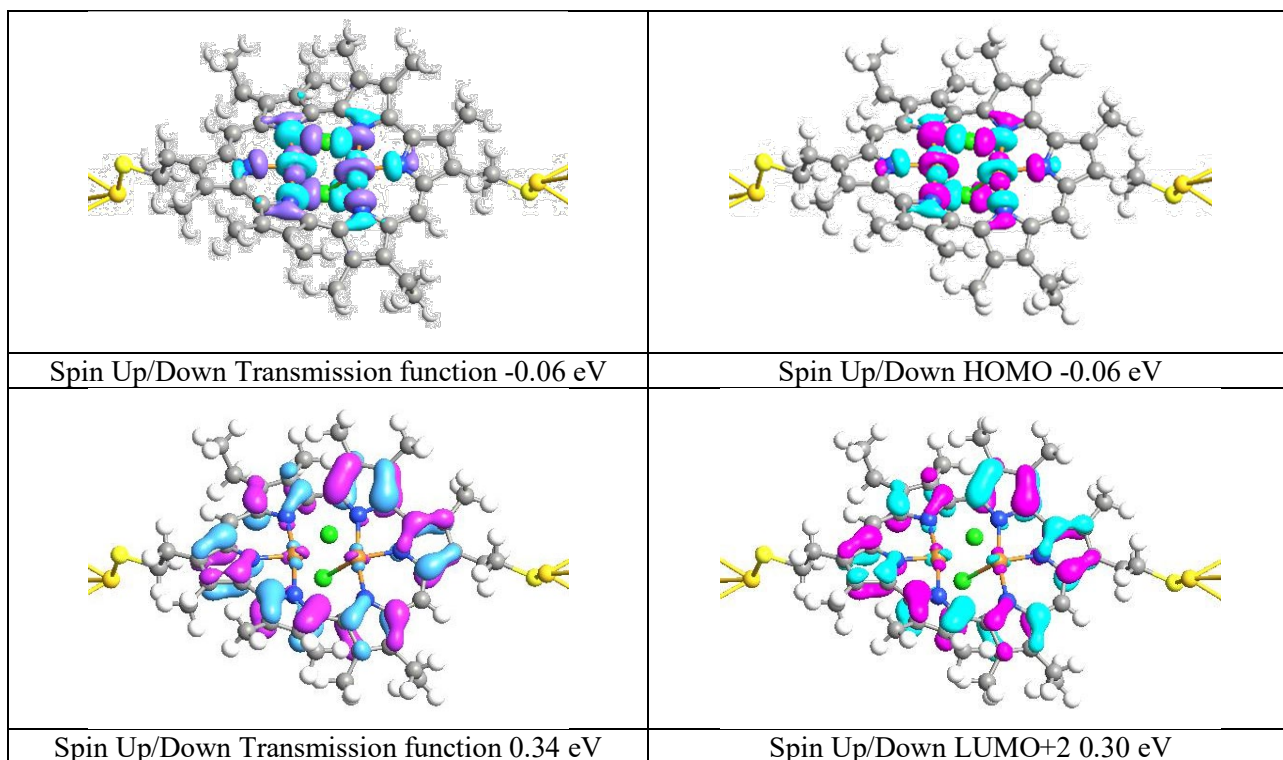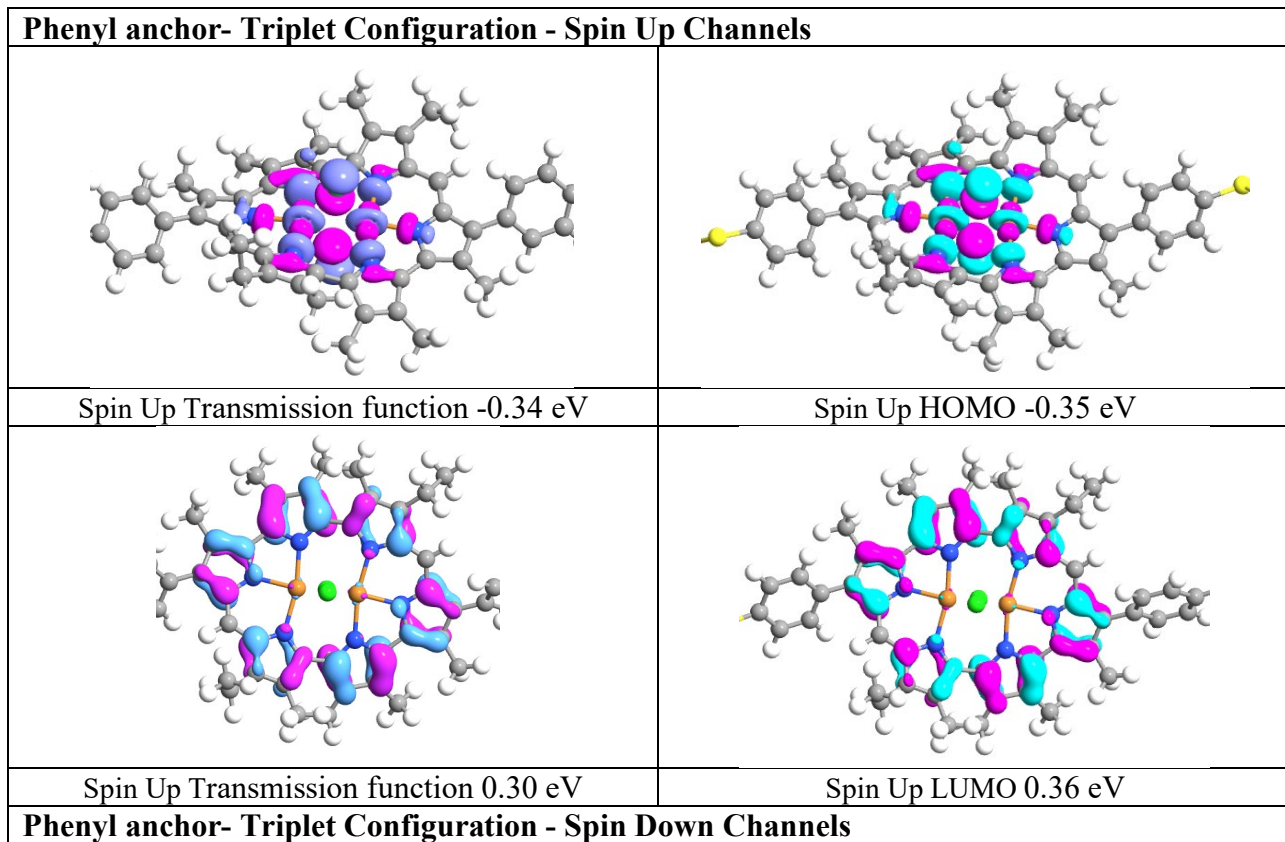

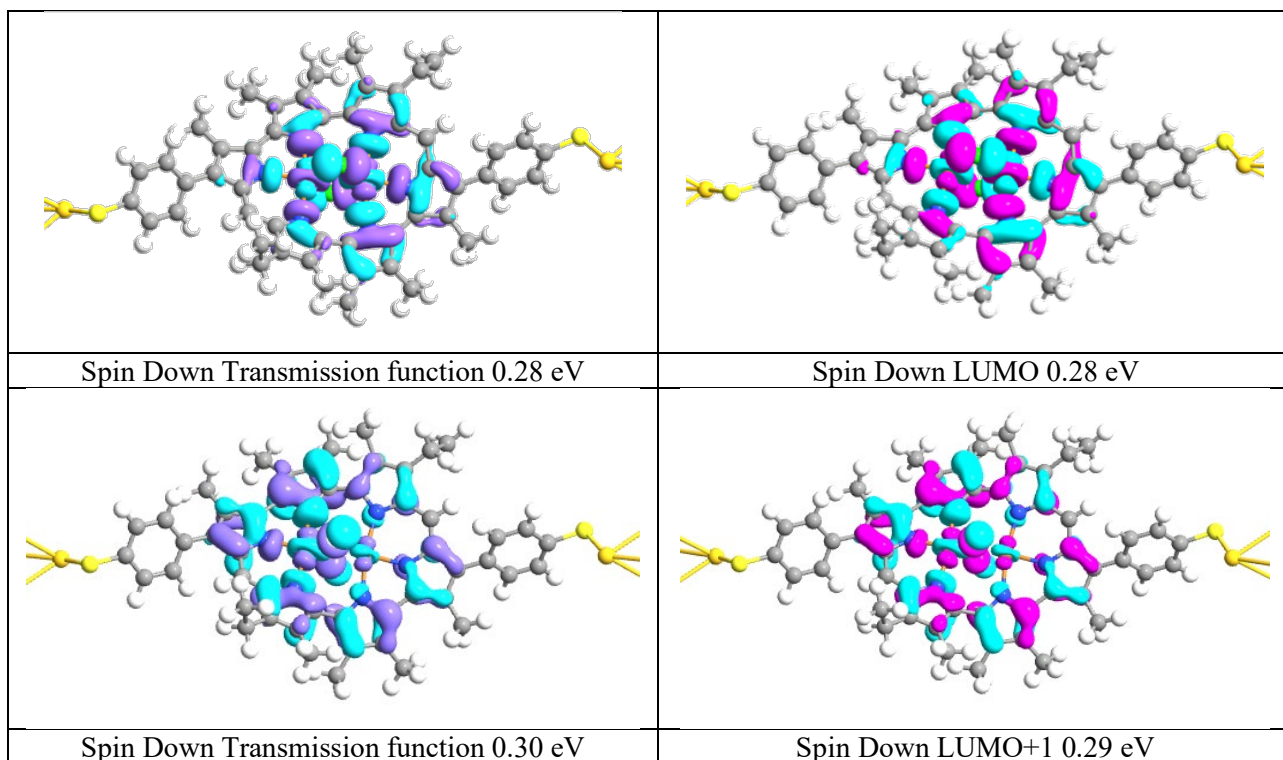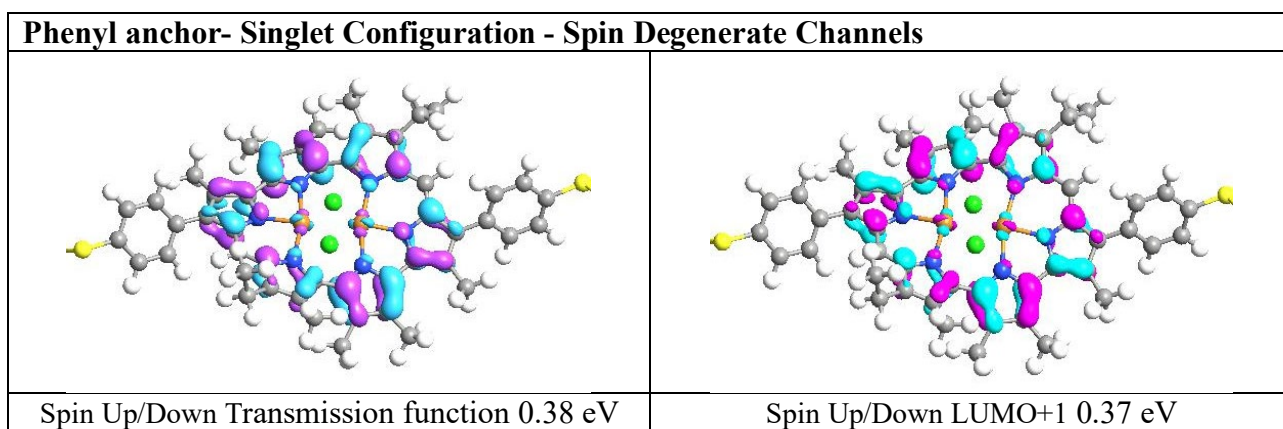

| <b>Ethynyl anchor- Triplet Configuration - Spin Up Channels</b>   |                          |
|-------------------------------------------------------------------|--------------------------|
|                                                                   |                          |
| Spin Up Transmission function -0.39 eV                            | Spin Up HOMO-1 -0.40 eV  |
|                                                                   |                          |
| Spin Up Transmission function 0.43 eV                             | Spin Up LUMO 0.36 eV     |
| <b>Ethynyl anchor- Triplet Configuration - Spin Down Channels</b> |                          |
|                                                                   |                          |
| Spin Down Transmission function -0.30 eV                          | Spin Down HOMO -0.32 eV  |
|                                                                   |                          |
| Spin Down Transmission function 0.35 eV                           | Spin Down LUMO+1 0.31 eV |

| Ethynyl anchor- Singlet Configuration - Spin Degenerate Channels                   |                                                                                     |
|------------------------------------------------------------------------------------|-------------------------------------------------------------------------------------|
| 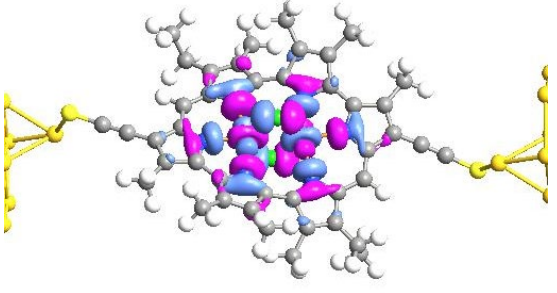  |   |
| Spin Up/Down Transmission function -0.05 eV                                        | Spin Up/Down HOMO -0.05 eV                                                          |
|   |   |
| Spin Up/Down Transmission function 0.04 eV                                         | Spin Up/Down LUMO 0.04 eV                                                           |
|  |  |
| Spin Up/Down Transmission function 0.43 eV                                         | Spin Up/Down LUMO+1 0.34 eV                                                         |



| Direct anchor- Triplet Configuration - Spin Up Channels                            |                                                                                     |
|------------------------------------------------------------------------------------|-------------------------------------------------------------------------------------|
| 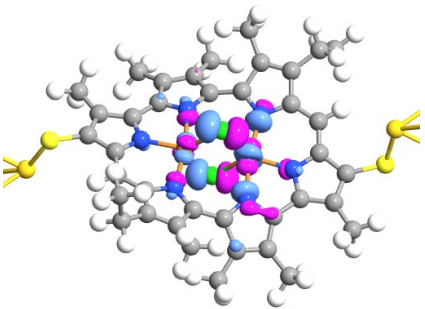  |   |
| Spin Up Transmission function -0.39 eV                                             | Spin Up HOMO-1 -0.41 eV                                                             |
|   |   |
| Spin Up Transmission function -0.31 eV                                             | Spin Up HOMO -0.30 eV                                                               |
|  |  |
| Spin Up Transmission function 0.40 eV                                              | Spin Up LUMO 0.30 eV                                                                |

| Direct anchor- Triplet Configuration - Spin Down Channels                         |                                                                                    |
|-----------------------------------------------------------------------------------|------------------------------------------------------------------------------------|
| 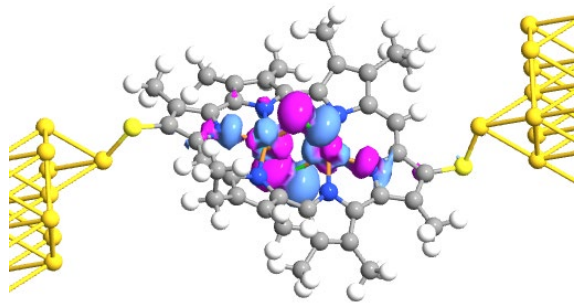 |  |
| Spin Down Transmission function -0.36 eV                                          | Spin Down HOMO -0.39 eV                                                            |
|  |  |
| Spin Down Transmission function 0.27 eV                                           | Spin Down LUMO 0.25 eV                                                             |



| Direct anchor- Singlet Configuration - Spin Degenerate Channels                     |                                                                                      |
|-------------------------------------------------------------------------------------|--------------------------------------------------------------------------------------|
| 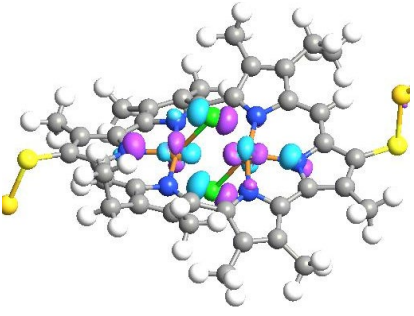   |    |
| Spin Up/Down Transmission function -0.44 eV                                         | Spin Up/Down HOMO-1 -0.47 eV                                                         |
|    |    |
| Spin Up/Down Transmission function -0.06 eV                                         | Spin Up/Down HOMO -0.06 eV                                                           |
|  |  |
| Spin Up/Down Transmission function 0.04 eV                                          | Spin Up/Down LUMO 0.05 eV                                                            |
|  |  |
| Spin Up/Down Transmission function 0.41 eV                                          | Spin Up/Down LUMO+1 0.31 eV                                                          |

Figure S8. Calculated spin resolved current on the Cu(II)-Amethyrin junctions

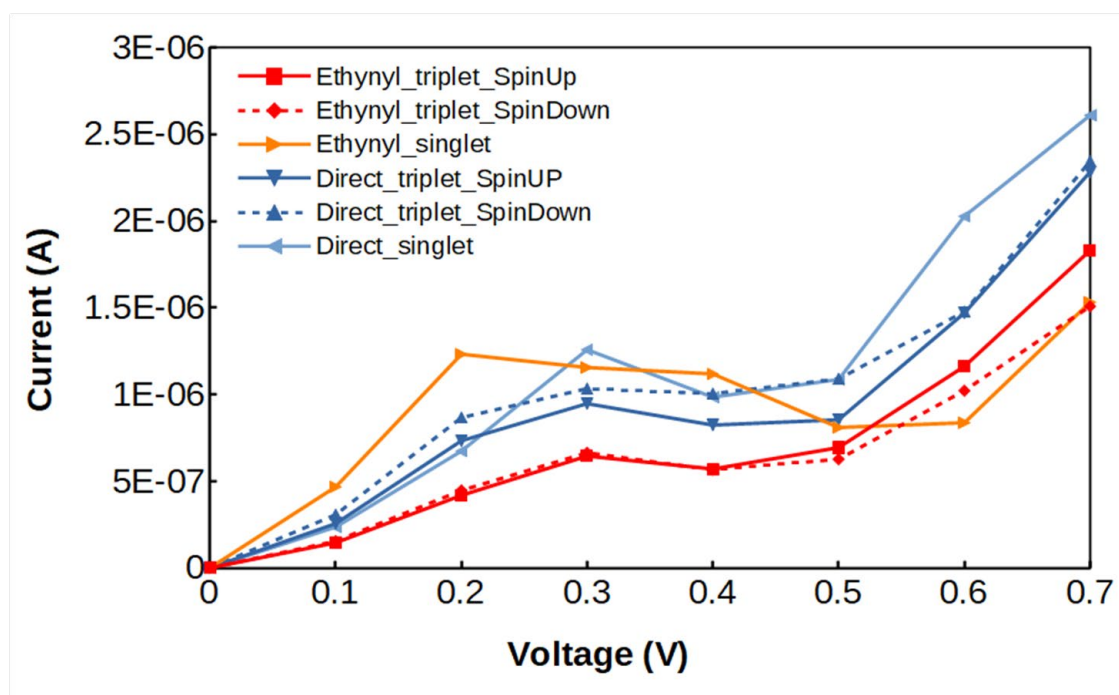

Figure S9. Calculated total current on the Cu(II)-Amethyrin junctions

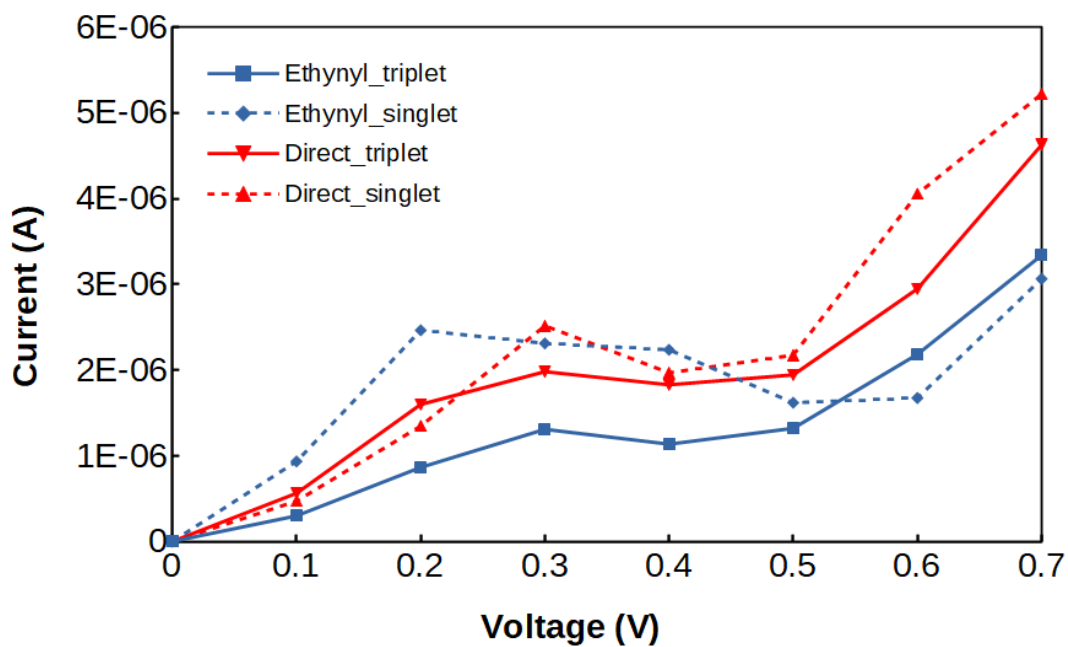

**Table S1.** Cartesian coordinates of the optimized structures for amethyrins in the ground state.

FB-Amethyrin systems

**FB- Ethyl-anchoring**

|   |             |             |             |
|---|-------------|-------------|-------------|
| C | 14.53994245 | 18.93001074 | 25.98566325 |
| C | 13.21989636 | 17.2506467  | 15.93262499 |
| C | 14.02330687 | 18.67236923 | 24.65227348 |
| C | 13.24134341 | 18.11212369 | 17.09517907 |
| C | 13.20235314 | 20.32349909 | 18.22543442 |
| C | 13.17953418 | 21.72739132 | 18.3381511  |
| C | 12.99320658 | 20.82345576 | 20.40175765 |
| C | 13.05083068 | 22.03963079 | 19.70539461 |
| C | 15.23041769 | 17.79860168 | 26.33729065 |
| C | 13.26159463 | 16.07298184 | 17.85274968 |
| C | 15.09578851 | 16.87677742 | 25.22687772 |
| C | 14.64823197 | 13.98721359 | 22.05699135 |
| C | 15.36269465 | 14.70071907 | 24.0648507  |
| C | 15.80160547 | 13.37428355 | 23.90546287 |
| N | 13.11295396 | 19.81415349 | 19.50098143 |
| N | 13.26964556 | 17.33725441 | 18.25206164 |
| N | 14.3640602  | 17.47414597 | 24.20681722 |
| N | 14.67576948 | 15.04125561 | 22.91851849 |
| C | 13.22719842 | 19.48682686 | 17.09299248 |
| C | 15.54787892 | 15.58276359 | 25.14827428 |
| C | 15.36617817 | 12.93072726 | 22.64404439 |
| C | 13.24542816 | 15.96300044 | 16.39836548 |
| C | 12.85707507 | 20.56327405 | 21.81254114 |
| C | 11.99115311 | 21.10617261 | 22.7510631  |
| C | 12.28414647 | 20.49791594 | 24.00196364 |
| C | 13.31208349 | 19.5886094  | 23.78846984 |
| N | 13.61864779 | 19.61736777 | 22.45053692 |
| H | 14.39887092 | 19.12318574 | 22.05357506 |
| C | 13.33842488 | 15.00034951 | 18.82538228 |
| C | 12.78814476 | 13.72169427 | 18.88144781 |
| C | 13.19565128 | 13.13320416 | 20.10842608 |
| C | 13.98808609 | 14.0622822  | 20.77554855 |
| N | 14.0357147  | 15.19154097 | 19.99532292 |
| H | 14.59267078 | 16.00901745 | 20.17452682 |
| C | 14.43658821 | 20.20704533 | 26.75372666 |
| H | 14.40928834 | 21.0662305  | 26.08134301 |
| H | 13.53406614 | 20.25561367 | 27.36877973 |
| H | 15.28776756 | 20.32816157 | 27.42661873 |
| C | 15.98042871 | 17.57376377 | 27.61160854 |
| H | 16.66363412 | 16.72811671 | 27.51497187 |
| H | 16.60059367 | 18.44728548 | 27.83312246 |
| C | 11.50312248 | 20.68447923 | 25.2614756  |
| H | 11.6473359  | 19.84406408 | 25.93980404 |
| H | 11.78262921 | 21.59981708 | 25.79163737 |
| H | 10.4354436  | 20.75289211 | 25.04156942 |
| C | 10.85245642 | 22.0275366  | 22.46318569 |
| H | 10.99936001 | 23.02151664 | 22.89595196 |
| H | 10.71067821 | 22.14811307 | 21.39024112 |
| H | 9.92254333  | 21.62649733 | 22.87623842 |
| C | 13.07395163 | 23.40446355 | 20.3185023  |
| H | 12.10584727 | 23.90880387 | 20.25608749 |
| H | 13.34205394 | 23.3476476  | 21.37385745 |
| H | 13.80157365 | 24.04689584 | 19.817337   |
| C | 13.27486161 | 22.72185357 | 17.22604155 |

|   |             |             |               |
|---|-------------|-------------|---------------|
| H | 13.63886273 | 22.23641764 | 16.31839842   |
| H | 14.02626134 | 23.47484754 | 17.48548564   |
| C | 13.25042216 | 17.69933805 | 14.50577461   |
| H | 12.72915985 | 16.97661273 | 13.87376978   |
| H | 12.72341757 | 18.64841871 | 14.38818101   |
| C | 13.35238877 | 14.7208107  | 15.57072813   |
| H | 13.88267831 | 13.93518293 | 16.10960355   |
| H | 12.37566597 | 14.31857963 | 15.29007429   |
| H | 13.89368104 | 14.91681817 | 14.64413574   |
| C | 11.81772546 | 13.10163147 | 17.92665162   |
| H | 11.33896632 | 13.85324604 | 17.30181546   |
| H | 12.29428807 | 12.36928732 | 17.26962622   |
| H | 11.0299013  | 12.57494191 | 18.46958746   |
| C | 12.73866301 | 11.81061223 | 20.6343062    |
| H | 13.2991476  | 10.97432411 | 20.20718623   |
| H | 12.84756803 | 11.76267202 | 21.71697722   |
| H | 11.68654071 | 11.64068043 | 20.39523751   |
| C | 15.69282113 | 11.61626013 | 22.00638893   |
| H | 15.06050078 | 10.80579632 | 22.37848173   |
| H | 15.55914681 | 11.66669642 | 20.92660573   |
| H | 16.7276837  | 11.3314852  | 22.2040216    |
| C | 16.65619698 | 12.61090076 | 24.86804639   |
| H | 16.42323848 | 12.90816773 | 25.893031     |
| H | 16.41097954 | 11.54799058 | 24.80017301   |
| C | 18.15625749 | 12.80859465 | 24.61223866   |
| H | 18.4269634  | 13.86132452 | 24.70772803   |
| H | 18.75632978 | 12.23317108 | 25.32024553   |
| H | 18.42475362 | 12.49208313 | 23.60298766   |
| C | 14.69711005 | 17.86059826 | 14.01090107   |
| H | 15.24125956 | 16.92403277 | 14.11808196   |
| H | 15.20502011 | 18.6237321  | 14.59747405   |
| C | 11.94466967 | 23.42803911 | 16.92775336   |
| H | 11.18881534 | 22.71088143 | 16.60373619   |
| H | 11.5613197  | 23.93352842 | 17.81525985   |
| H | 12.07307085 | 24.17577192 | 16.14203229   |
| C | 15.02772756 | 17.33184708 | 28.79175772   |
| H | 14.43329415 | 16.43599374 | 28.62136436   |
| H | 14.35737309 | 18.18070739 | 28.90458519   |
| H | 13.04374651 | 18.81099768 | 19.65134308   |
| H | 14.19959669 | 15.9370562  | 22.85519124   |
| H | 16.08835419 | 15.18443615 | 25.99761449   |
| H | 13.215082   | 19.98463194 | 16.13180124   |
| H | 15.58168016 | 17.20190706 | 29.7462060924 |
| H | 14.73591596 | 18.16347976 | 12.9425018262 |

**FB-Direct-anchoring**

|   |                   |                   |                   |
|---|-------------------|-------------------|-------------------|
| C | 16.43527059612278 | 20.37189409421316 | 15.16905035656495 |
| C | 18.13412510605393 | 19.24238040926011 | 25.25576863419417 |
| C | 17.03248268534521 | 20.28687019649881 | 16.50408476824819 |
| C | 17.93798911197223 | 20.08521049185511 | 24.09627179631686 |
| C | 17.43833784539564 | 22.23507145870944 | 22.93044313604253 |
| C | 17.10590025002782 | 23.61402601897440 | 22.78967940360889 |
| C | 17.55354561269530 | 22.73259314788646 | 20.72747652161996 |
| C | 17.17858839768445 | 23.92574917811275 | 21.40947667294479 |
| C | 16.08288738012613 | 19.06973657281497 | 14.85162093365870 |
| C | 18.55885283691058 | 18.12937393521354 | 23.33408347517349 |
| C | 16.46453561459960 | 18.24099093980432 | 15.97488668006012 |

|   |                   |                   |                   |
|---|-------------------|-------------------|-------------------|
| C | 17.77064132946874 | 15.66295521978708 | 19.16790227800353 |
| C | 16.77529324933717 | 16.07789224625488 | 17.18068442942358 |
| C | 16.70753879527170 | 14.67144229080699 | 17.40383532212530 |
| N | 17.68834316610077 | 21.73811635315207 | 21.65973344135315 |
| N | 18.19798259726944 | 19.36058024779055 | 22.93133582937990 |
| N | 17.03294889871329 | 19.02860021194477 | 16.97769106919823 |
| N | 17.41693578308337 | 16.63945010777027 | 18.27463449119034 |
| C | 17.56941776093480 | 21.43179819539811 | 24.08686993226965 |
| C | 16.33849429053444 | 16.85471702656206 | 16.08324526212936 |
| C | 17.32073801458462 | 14.41285500738381 | 18.65295205796265 |
| C | 18.52783544910884 | 17.99745424758208 | 24.79268062322150 |
| C | 17.71729808255569 | 22.49686702478813 | 19.30943022098092 |
| C | 18.30867515972630 | 23.29140973532142 | 18.30545227207143 |
| C | 18.16028636996173 | 22.59295841757241 | 17.06584189826782 |
| C | 17.48377014079713 | 21.38616093018625 | 17.34056002481412 |
| N | 17.26134887096653 | 21.34084949747175 | 18.70367858403628 |
| H | 16.71433839833667 | 20.60779939528927 | 19.15058886440423 |
| C | 18.81162997360700 | 17.08153962734263 | 22.35972714028173 |
| C | 19.69223402159352 | 15.97971696639830 | 22.33026550568426 |
| C | 19.45052944112244 | 15.27191257538605 | 21.11071198049360 |
| C | 18.42664676733657 | 15.95635395310473 | 20.42327869906229 |
| N | 18.08819809719516 | 17.06058788202809 | 21.18256086322657 |
| H | 17.32132903888740 | 17.70297075282759 | 20.99370453232943 |
| C | 16.15214632199668 | 21.61858432624768 | 14.38311643164105 |
| H | 15.98347213633907 | 22.47969926597857 | 15.05787477888890 |
| H | 16.98809522934796 | 21.89514062496226 | 13.70887011506018 |
| H | 15.25231216720547 | 21.48917074348618 | 13.75324543100052 |
| C | 18.76157851088969 | 23.00984518674492 | 15.75543745531767 |
| H | 18.86722543677945 | 22.14811832643163 | 15.07353480454088 |
| H | 18.15492244733693 | 23.78034805898079 | 15.23733697907099 |
| H | 19.76944534894891 | 23.44427926680252 | 15.90618973575066 |
| C | 19.08554555815835 | 24.55725244865068 | 18.51534036600194 |
| H | 18.53124349857265 | 25.45581782622680 | 18.17537490688962 |
| H | 19.33682574697692 | 24.69750388170584 | 19.58159338523217 |
| H | 20.03561757588786 | 24.53430902924339 | 17.94565643181254 |
| C | 16.80968521360779 | 25.23198623687759 | 20.77120541743931 |
| H | 17.64281501723795 | 25.96378147229200 | 20.78494090112456 |
| H | 16.51730595830374 | 25.08538850495038 | 19.71523262339805 |
| H | 15.96016846933974 | 25.70388266274538 | 21.30165217728061 |
| C | 16.77226828790221 | 24.56863575951325 | 23.89901530932571 |
| H | 16.42392032043269 | 24.00876296453190 | 24.78929508224980 |
| H | 15.91727131818692 | 25.20598146650797 | 23.58870698931601 |
| C | 18.74718185494475 | 16.74950529415742 | 25.59617090449566 |
| H | 18.41969698366592 | 15.85421457041018 | 25.03326922545030 |
| H | 19.81251807230214 | 16.59353576920472 | 25.86013016676335 |
| H | 18.17817676034907 | 16.78994485112342 | 26.54364235645269 |
| C | 20.79309346073403 | 15.67747398076265 | 23.30448787367737 |
| H | 21.06224132952394 | 16.57129218567641 | 23.89434434506961 |
| H | 20.51943273949099 | 14.87109981591899 | 24.01501584446630 |
| H | 21.70463599971497 | 15.33989982334900 | 22.77334817497957 |
| C | 20.24693333555609 | 14.11074675855837 | 20.59323161717004 |
| H | 19.98867758691862 | 13.15968998721938 | 21.10205078361387 |
| H | 20.08566439127175 | 13.96958535495120 | 19.50977188856359 |
| H | 21.33105826860631 | 14.27457242775192 | 20.75389076148796 |
| C | 17.37595627802402 | 13.08963625630896 | 19.35974782565350 |
| H | 18.21225203450200 | 12.45263290008440 | 19.00619032773348 |
| H | 17.50629276139690 | 13.23138672755950 | 20.44803814543375 |

|   |                   |                   |                   |
|---|-------------------|-------------------|-------------------|
| H | 16.44222930726743 | 12.51806807264320 | 19.19899213878151 |
| C | 15.99563675313041 | 13.67941723030779 | 16.52907974447199 |
| H | 16.14063107102429 | 13.94531665657698 | 15.46213019599241 |
| H | 16.45540894194706 | 12.67943098705798 | 16.65851558975192 |
| C | 14.48660300151825 | 13.60284820835368 | 16.83999917859449 |
| H | 14.00828502213225 | 14.58853691607514 | 16.68168698225917 |
| H | 13.97955530757481 | 12.85881187255152 | 16.19525137422389 |
| H | 14.31784261937381 | 13.31951691447160 | 17.89686066413763 |
| C | 17.96296917670869 | 25.46989379244651 | 24.28285689683259 |
| H | 18.81654157974707 | 24.85890854421939 | 24.63399734164114 |
| H | 18.30815918929753 | 26.05669883374431 | 23.41009914744621 |
| H | 17.68536716341302 | 26.17900277689255 | 25.08674422126681 |
| H | 15.58253378789639 | 18.72390328125829 | 13.93944842044212 |
| H | 17.96782948018052 | 19.53637664107907 | 26.29886697905173 |
| H | 18.00787691111616 | 20.75557624707508 | 21.56523126063465 |
| H | 17.60886719085966 | 17.65880929058454 | 18.26917071631096 |
| H | 15.88161920729774 | 16.31496547553281 | 15.24268821861829 |
| H | 17.38860337863558 | 21.91776836172084 | 25.05501551284758 |

### FB-Phenyl-anchoring

|   |             |             |             |
|---|-------------|-------------|-------------|
| C | 20.87268259 | 15.16533283 | 27.50292339 |
| C | 19.87027978 | 17.93953438 | 17.67128531 |
| C | 21.10613778 | 15.50788593 | 26.10993127 |
| C | 20.0286215  | 16.92570329 | 18.70542842 |
| C | 20.1190127  | 14.58507385 | 19.55119468 |
| C | 20.01363888 | 13.16912527 | 19.49953395 |
| C | 20.81678068 | 13.78082106 | 21.54144342 |
| C | 20.44603749 | 12.66664084 | 20.74289597 |
| C | 20.51451393 | 16.35724628 | 28.12117819 |
| C | 20.65740536 | 18.81612697 | 19.60372925 |
| C | 20.52987412 | 17.37579313 | 27.08226048 |
| C | 20.71421823 | 20.54745312 | 24.17534054 |
| C | 20.28784214 | 19.69894734 | 26.22295357 |
| C | 20.04244715 | 21.0969995  | 26.2806229  |
| N | 20.58882021 | 14.91472699 | 20.8119699  |
| N | 20.49698038 | 17.50765136 | 19.87609996 |
| N | 20.87859687 | 16.80892027 | 25.86236738 |
| N | 20.67899882 | 19.40592308 | 24.92707163 |
| C | 19.87065835 | 15.5510203  | 18.56068164 |
| C | 20.226138   | 18.72385518 | 27.23310177 |
| C | 20.30082914 | 21.62560196 | 25.00130848 |
| C | 20.28394109 | 19.14151872 | 18.24131759 |
| C | 21.29728686 | 13.82836065 | 22.89875217 |
| C | 22.21430669 | 13.01582694 | 23.58355458 |
| C | 22.30888357 | 13.50764222 | 24.91697826 |
| C | 21.44917528 | 14.61187648 | 25.02245777 |
| N | 20.88567016 | 14.81009534 | 23.77904401 |
| H | 20.13642033 | 15.47371637 | 23.61577767 |
| C | 21.05294693 | 19.73535833 | 20.65018059 |
| C | 21.82301329 | 20.90961274 | 20.66235454 |
| C | 21.82463216 | 21.40779005 | 21.99675833 |
| C | 21.05822159 | 20.52749894 | 22.7756608  |
| N | 20.64143397 | 19.50512579 | 21.94658535 |
| H | 19.96991171 | 18.7849963  | 22.1895195  |
| C | 20.97583693 | 13.80473222 | 28.11875579 |
| H | 20.74630174 | 13.02390426 | 27.38013655 |
| H | 21.98783566 | 13.60002583 | 28.50237154 |



|   |              |             |              |
|---|--------------|-------------|--------------|
| H | 20.28858497  | 13.69237776 | 28.96628317  |
| C | 23.28139252  | 13.02165547 | 25.94605886  |
| H | 23.4286632   | 13.76674186 | 26.73699881  |
| H | 22.95690139  | 12.08192566 | 26.42072796  |
| H | 24.26324849  | 12.82509633 | 25.48883447  |
| C | 23.05779015  | 11.93035258 | 22.99179159  |
| H | 22.71843289  | 10.92608914 | 23.2920862   |
| H | 23.04745111  | 11.97394537 | 21.89520679  |
| H | 24.104098    | 12.02460039 | 23.32078749  |
| C | 20.40690931  | 11.23737489 | 21.18614413  |
| H | 21.28118486  | 10.66387307 | 20.84000833  |
| H | 20.3833915   | 11.16955421 | 22.28207557  |
| H | 19.51323216  | 10.72990481 | 20.7934364   |
| C | 19.54406612  | 12.36091557 | 18.3298316   |
| H | 18.90521264  | 12.97605524 | 17.67781492  |
| H | 18.90681288  | 11.5359542  | 18.68968276  |
| C | 20.16387379  | 20.51266376 | 17.65170106  |
| H | 19.96360268  | 21.2549527  | 18.437365    |
| H | 21.07707309  | 20.83676598 | 17.12834796  |
| H | 19.34444461  | 20.54894112 | 16.91979801  |
| C | 22.63532462  | 21.46629158 | 19.5346461   |
| H | 22.78768735  | 20.71724013 | 18.74785741  |
| H | 22.16471037  | 22.34862459 | 19.0723529   |
| H | 23.62759561  | 21.78277617 | 19.89095841  |
| C | 22.62289038  | 22.57167531 | 22.4947383   |
| H | 22.17722808  | 23.53788432 | 22.20920807  |
| H | 22.71145663  | 22.55211926 | 23.58829869  |
| H | 23.64075858  | 22.55484366 | 22.07534358  |
| C | 20.07402287  | 23.04011947 | 24.56389263  |
| H | 20.89216217  | 23.71008051 | 24.8726968   |
| H | 19.9923001   | 23.10219962 | 23.47078127  |
| H | 19.146685    | 23.44155752 | 24.99787227  |
| C | 19.5034445   | 21.84290264 | 27.46319533  |
| H | 19.92578776  | 21.42979027 | 28.39309298  |
| H | 19.83672602  | 22.89121481 | 27.41456716  |
| C | 17.96532249  | 21.79279728 | 27.53631727  |
| H | 17.61642562  | 20.75436397 | 27.62740909  |
| H | 17.59016535  | 22.3606469  | 28.40001662  |
| H | 17.51682074  | 22.21513205 | 26.62545849  |
| C | 20.71045115  | 11.77911811 | 17.50994299  |
| H | 21.34362961  | 12.58516093 | 17.11293036  |
| H | 21.34421238  | 11.13360479 | 18.13483121  |
| H | 20.34074122  | 11.18120677 | 16.6643767   |
| H | 19.216722591 | 17.27144008 | 33.284373240 |
| H | 17.896241862 | 17.23052757 | 12.696810775 |
| H | 20.8243625   | 15.8978559  | 21.01440265  |
| H | 20.98177184  | 18.4481497  | 24.69805535  |
| H | 19.93345768  | 19.06680532 | 28.22709926  |
| H | 19.56459917  | 15.17799685 | 17.582403    |
| C | 20.1669      | 16.58959155 | 29.5271291   |
| C | 20.83996165  | 17.57496562 | 30.28076436  |
| C | 19.14113103  | 15.85887319 | 30.1618403   |
| C | 20.50657572  | 17.81804422 | 31.60960163  |
| H | 21.65120213  | 18.13538802 | 29.81314574  |
| C | 18.80563202  | 16.09512211 | 31.49068327  |
| H | 18.58187665  | 15.11935457 | 29.5870261   |
| C | 19.48220417  | 17.08182418 | 32.23269562  |

|   |             |             |             |
|---|-------------|-------------|-------------|
| H | 21.04214194 | 18.57331653 | 32.18592643 |
| H | 18.00695924 | 15.52803102 | 31.97011634 |
| C | 19.33755826 | 17.73680874 | 16.32701498 |
| C | 18.19802037 | 16.9328322  | 16.09918534 |
| C | 19.93745183 | 18.3580894  | 15.20861401 |
| C | 17.68625112 | 16.75484304 | 14.81834242 |
| H | 17.68899899 | 16.48062936 | 16.95164482 |
| C | 19.43373425 | 18.17867334 | 13.92658068 |
| H | 20.83009306 | 18.96661021 | 15.35755179 |
| C | 18.30032779 | 17.37064152 | 13.71136025 |
| H | 16.79266455 | 16.15024871 | 14.6589845  |
| H | 19.91169822 | 18.65666481 | 13.07077548 |

### FB-Ethynyl anchoring

|   |             |            |             |
|---|-------------|------------|-------------|
| C | 3.98867987  | 4.89424513 | 17.56325068 |
| C | 1.39233058  | 3.02834484 | 27.27777069 |
| C | 3.72038303  | 4.29501569 | 18.84069788 |
| C | 2.38392008  | 3.22800863 | 26.22413688 |
| C | 4.69170563  | 3.67662318 | 25.42046133 |
| C | 6.08723925  | 3.94516985 | 25.5111667  |
| C | 5.53300337  | 3.60980689 | 23.32687113 |
| C | 6.61200737  | 3.90434814 | 24.20751814 |
| C | 2.73104736  | 5.27207596 | 17.05996996 |
| C | 0.5139134   | 2.69159191 | 25.22361128 |
| C | 1.75699359  | 4.88022865 | 18.07485971 |
| C | -1.31948476 | 3.57537567 | 20.78103054 |
| C | -0.56521245 | 4.59050005 | 18.91053716 |
| C | -1.98771064 | 4.65722232 | 18.89096103 |
| N | 4.39609075  | 3.50150558 | 24.07735201 |
| N | 1.80698317  | 3.03437628 | 24.99005207 |
| N | 2.39780678  | 4.30563432 | 19.14828521 |
| N | -0.20384101 | 3.9433762  | 20.08225074 |
| C | 3.72690293  | 3.54035708 | 26.42521606 |
| C | 0.37470347  | 5.02106829 | 17.96763974 |
| C | -2.45753962 | 4.03367446 | 20.05839002 |
| C | 0.19519088  | 2.68665327 | 26.62433188 |
| C | 5.51040024  | 3.49937785 | 21.89355633 |
| C | 6.41636743  | 2.91677749 | 20.99136917 |
| C | 5.89329059  | 3.10324673 | 19.68113452 |
| C | 4.67872862  | 3.79687826 | 19.80573989 |
| N | 4.4473597   | 3.98047953 | 21.15188286 |
| H | 3.70270567  | 4.57199112 | 21.50461843 |
| C | -0.38692211 | 2.47542466 | 24.11029797 |
| C | -1.48116151 | 1.616708   | 23.91449858 |
| C | -2.0139623  | 1.88969095 | 22.62343262 |
| C | -1.2336365  | 2.90906599 | 22.05222359 |
| N | -0.2297674  | 3.20901214 | 22.9543327  |
| H | 0.4072114   | 3.9954396  | 22.88620128 |
| C | 5.30789948  | 5.18778923 | 16.93071224 |
| H | 6.09366735  | 5.30269014 | 17.69009386 |
| H | 5.62861217  | 4.38803249 | 16.24447236 |
| H | 5.24521283  | 6.11078031 | 16.33713317 |
| C | 6.46900569  | 2.51867679 | 18.42947476 |
| H | 5.72293403  | 2.48627567 | 17.62649906 |
| H | 7.33764258  | 3.08781083 | 18.06245149 |
| H | 6.81386325  | 1.48831194 | 18.60533893 |
| C | 7.62561872  | 2.10662226 | 21.33894783 |

|   |             |             |               |
|---|-------------|-------------|---------------|
| H | 8.56312011  | 2.64616694  | 21.13033148   |
| H | 7.62603343  | 1.8282289   | 22.40018371   |
| H | 7.65522057  | 1.17760536  | 20.74928347   |
| C | 8.01432862  | 4.23685775  | 23.80369416   |
| H | 8.69835227  | 3.38093334  | 23.91261879   |
| H | 8.05364436  | 4.5580425   | 22.75437758   |
| H | 8.41603641  | 5.05074604  | 24.42485025   |
| C | 6.84993889  | 4.20490068  | 26.77248925   |
| H | 6.17307966  | 4.59068589  | 27.54950118   |
| H | 7.59262313  | 4.99945464  | 26.59168627   |
| C | -1.13272481 | 2.49520276  | 27.27710547   |
| H | -1.94867072 | 2.80198625  | 26.60802421   |
| H | -1.31428333 | 1.44527649  | 27.55612096   |
| H | -1.18641726 | 3.08601752  | 28.20246427   |
| C | -1.92223945 | 0.50456808  | 24.814209     |
| H | -1.13639321 | 0.23992973  | 25.53213774   |
| H | -2.82761635 | 0.76131029  | 25.38650675   |
| H | -2.15822114 | -0.39745096 | 24.22927333   |
| C | -3.10113997 | 1.11341264  | 21.94891758   |
| H | -4.1014896  | 1.38322604  | 22.32282457   |
| H | -3.09164709 | 1.27487669  | 20.86387561   |
| H | -2.97561769 | 0.03459342  | 22.1278793    |
| C | -3.88239321 | 3.97396918  | 20.51645496   |
| H | -4.44851608 | 3.17042527  | 20.0196771    |
| H | -3.93879831 | 3.79768353  | 21.5983982    |
| H | -4.40222534 | 4.91795771  | 20.29851163   |
| C | -2.81211298 | 5.36766544  | 17.86176012   |
| H | -2.36036624 | 5.23913204  | 16.86561424   |
| H | -3.8086495  | 4.90268448  | 17.81049043   |
| C | -2.95652903 | 6.8714815   | 18.16585121   |
| H | -1.97154181 | 7.35874792  | 18.18029723   |
| H | -3.57727672 | 7.36968489  | 17.40758736   |
| H | -3.42139725 | 7.02938635  | 19.1497976    |
| C | 7.56942417  | 2.94617778  | 27.29233396   |
| H | 6.84491061  | 2.148559    | 27.5087351    |
| H | 8.27791413  | 2.56200866  | 26.54449202   |
| H | 8.12801973  | 3.16451064  | 28.21368654   |
| H | 3.44935259  | 3.20529555  | 23.80246905   |
| H | 0.78424885  | 3.70634088  | 20.24499158   |
| H | -0.00095117 | 5.48344877  | 17.052214     |
| H | 4.05232193  | 3.65849695  | 27.46076965   |
| C | 1.60859899  | 3.19523666  | 28.64102893   |
| C | 1.85261161  | 3.34998932  | 29.8449222    |
| C | 2.44622735  | 5.92316643  | 15.86477538   |
| C | 2.15576312  | 6.51018483  | 14.81422919   |
| H | 1.91810049  | 7.01799495  | 13.8897725879 |
| H | 2.04382011  | 3.48303004  | 30.9007183252 |

#### Cu-Amethyrin systems

##### **Cu-Ethyl anchoring**

|   |             |             |             |
|---|-------------|-------------|-------------|
| C | 15.75217199 | 21.10109446 | 26.68860147 |
| C | 13.49935741 | 17.8785041  | 16.51784265 |
| C | 15.42437572 | 20.90554959 | 25.27671166 |
| C | 13.8656868  | 18.83787127 | 17.55508605 |
| C | 14.51415769 | 21.02516873 | 18.54605975 |
| C | 14.85353862 | 22.42939239 | 18.40106813 |
| C | 14.74531684 | 21.82350492 | 20.59164984 |

|   |             |             |             |
|---|-------------|-------------|-------------|
| C | 15.00675304 | 22.93217141 | 19.67229696 |
| C | 16.26408419 | 19.89292575 | 27.13018247 |
| C | 13.73674743 | 16.8602078  | 18.53476894 |
| C | 16.22081972 | 18.97210602 | 25.99906255 |
| C | 15.68540393 | 16.00969616 | 22.86079529 |
| C | 16.45278945 | 16.82801872 | 24.76346163 |
| C | 16.95173835 | 15.46645415 | 24.67224065 |
| N | 14.53051305 | 20.67833188 | 19.88718852 |
| N | 13.97320806 | 18.18258404 | 18.72947926 |
| N | 15.72112885 | 19.62590844 | 24.93169513 |
| N | 15.74559177 | 17.14346061 | 23.61504259 |
| C | 14.15509028 | 20.20127787 | 17.47065702 |
| C | 16.6204889  | 17.63774466 | 25.89401272 |
| C | 16.4986512  | 14.9587042  | 23.47880078 |
| C | 13.42028515 | 16.63740955 | 17.12498877 |
| C | 14.68030458 | 21.97977402 | 22.01632817 |
| C | 14.14731419 | 23.16892066 | 22.69353233 |
| C | 14.35121472 | 22.98570217 | 24.04771896 |
| C | 14.97312809 | 21.68938297 | 24.18714971 |
| N | 15.10558231 | 21.09680541 | 22.94681779 |
| C | 13.98622093 | 16.06961845 | 19.68274352 |
| C | 13.69236084 | 14.71108038 | 20.06887932 |
| C | 14.24810331 | 14.54110374 | 21.32302795 |
| C | 14.90166544 | 15.80849171 | 21.67760568 |
| N | 14.66057243 | 16.71392934 | 20.69983065 |
| C | 15.6211836  | 22.35276175 | 27.49336125 |
| H | 16.08738619 | 23.20767353 | 26.98298345 |
| H | 14.56832757 | 22.61756103 | 27.6718673  |
| H | 16.10181527 | 22.24247878 | 28.47476931 |
| C | 16.72694647 | 19.52880389 | 28.50542451 |
| H | 17.54699227 | 18.79584513 | 28.4497653  |
| H | 17.12651747 | 20.4109698  | 29.02855421 |
| C | 13.88729628 | 23.89715814 | 25.13759057 |
| H | 13.35359478 | 23.34643502 | 25.92473965 |
| H | 14.72405575 | 24.42641378 | 25.61875242 |
| H | 13.20656075 | 24.66219964 | 24.74138166 |
| C | 13.30777505 | 24.25394419 | 22.08612085 |
| H | 13.78356982 | 25.24443138 | 22.14620999 |
| H | 13.0817726  | 24.04658715 | 21.03394391 |
| H | 12.3450738  | 24.32463793 | 22.61604489 |
| C | 15.55841997 | 24.28668026 | 20.00496886 |
| H | 14.86291818 | 25.10093183 | 19.75196822 |
| H | 15.81301217 | 24.37233334 | 21.0674922  |
| H | 16.48193545 | 24.46298972 | 19.43186673 |
| C | 14.9968483  | 23.17878687 | 17.1125583  |
| H | 15.33991139 | 22.50555723 | 16.31175982 |
| H | 15.78409399 | 23.94165336 | 17.22592804 |
| C | 13.35134312 | 18.21523358 | 15.066877   |
| H | 12.71958045 | 17.47309981 | 14.55693315 |
| H | 12.84856325 | 19.18891301 | 14.95301077 |
| C | 13.15267047 | 15.33217301 | 16.44782007 |
| H | 13.89324785 | 14.57477142 | 16.74121411 |
| H | 12.16073551 | 14.92951149 | 16.70247867 |
| H | 13.19713003 | 15.4369606  | 15.35581107 |
| C | 12.84260677 | 13.72452237 | 19.33484327 |
| H | 11.9828618  | 14.21066392 | 18.85450563 |
| H | 13.40642693 | 13.20125224 | 18.54637914 |

|    |             |             |               |
|----|-------------|-------------|---------------|
| H  | 12.45742196 | 12.95529902 | 20.01806936   |
| C  | 13.9789779  | 13.37614833 | 22.22884203   |
| H  | 14.50764636 | 12.46243869 | 21.9180501    |
| H  | 14.25695378 | 13.59620104 | 23.26579346   |
| H  | 12.90305775 | 13.1424092  | 22.2251363    |
| C  | 16.95900417 | 13.66859328 | 22.86540362   |
| H  | 16.55863095 | 12.7857273  | 23.38619952   |
| H  | 16.67945631 | 13.5973841  | 21.80823872   |
| H  | 18.05610021 | 13.60479609 | 22.91993342   |
| C  | 17.89122809 | 14.81219224 | 25.63781223   |
| H  | 17.5772455  | 15.02390384 | 26.67347233   |
| H  | 17.82880858 | 13.71937207 | 25.52140807   |
| C  | 19.34916716 | 15.27233836 | 25.443337     |
| H  | 19.43752685 | 16.35825456 | 25.58835602   |
| H  | 20.02110988 | 14.77145422 | 26.15522602   |
| H  | 19.6960945  | 15.04786686 | 24.42460845   |
| C  | 14.73784155 | 18.27025451 | 14.38817232   |
| H  | 15.21805868 | 17.28462889 | 14.43789538   |
| H  | 15.37795079 | 18.9995709  | 14.90040778   |
| C  | 13.68519352 | 23.86554523 | 16.68598566   |
| H  | 12.88504974 | 23.12541448 | 16.54228648   |
| H  | 13.34850832 | 24.5712223  | 17.45872617   |
| H  | 13.81489787 | 24.41924414 | 15.74480876   |
| C  | 15.55923824 | 18.93106118 | 29.31974122   |
| H  | 15.16097676 | 18.04559663 | 28.80841927   |
| H  | 14.75671257 | 19.67271493 | 29.42016117   |
| Cl | 13.10631484 | 18.83435977 | 22.34573258   |
| Cl | 16.87978371 | 18.9814406  | 21.24200413   |
| Cu | 15.41943816 | 19.07371754 | 23.08483805   |
| Cu | 14.62631685 | 18.74784958 | 20.48282183   |
| H  | 17.08949402 | 17.17448599 | 26.763188     |
| H  | 14.1000129  | 20.67439896 | 16.48941596   |
| H  | 15.88367365 | 18.62850199 | 30.3387690328 |
| H  | 14.65890328 | 18.56496975 | 13.3197084989 |

### **Cu-Direct anchoring**

|   |                   |                   |                   |
|---|-------------------|-------------------|-------------------|
| C | 15.88651333178213 | 20.85185129326119 | 14.99156132470428 |
| C | 18.35453792275464 | 18.44192539767653 | 25.36691330409496 |
| C | 16.23164904256946 | 20.74880732179451 | 16.41689803820267 |
| C | 17.85066536784308 | 19.30163995877451 | 24.30556015556928 |
| C | 17.04037450404650 | 21.37278322526442 | 23.16839116986125 |
| C | 16.60105521680154 | 22.76242325951572 | 23.20795152465813 |
| C | 16.77407781525508 | 22.00276825246548 | 21.06182307872466 |
| C | 16.42229303658237 | 23.15822363709277 | 21.89458685994831 |
| C | 15.45528424258899 | 19.58642867746346 | 14.62420148608607 |
| C | 18.15055870138093 | 17.28824105455176 | 23.41896294906036 |
| C | 15.54840608008023 | 18.72831936210102 | 15.79718201130831 |
| C | 16.27518571753403 | 16.02617578868039 | 19.13792729581173 |
| C | 15.45121527752872 | 16.64899416279552 | 17.17884721258788 |
| C | 15.06305730283781 | 15.25339035558416 | 17.36311363976279 |
| N | 17.06296699189086 | 20.93278677388486 | 21.85210063068165 |
| N | 17.75516341669923 | 18.56344873150668 | 23.17487796385075 |
| N | 16.01315229449426 | 19.47297716757991 | 16.82726989032397 |
| N | 16.12297813765919 | 17.09509602552376 | 18.30830071765975 |
| C | 17.45484407921387 | 20.65089689799193 | 24.30579474857399 |
| C | 15.23122009391366 | 17.37116047572340 | 15.98854535749101 |
| C | 15.55576619336600 | 14.86611457798119 | 18.59469962046657 |

|   |                   |                   |                   |
|---|-------------------|-------------------|-------------------|
| C | 18.55559091784404 | 17.18047728977298 | 24.82765962798900 |
| C | 16.86069376688137 | 22.06952933099334 | 19.62496667890013 |
| C | 17.33460761191004 | 23.25237154779870 | 18.88434479451766 |
| C | 17.17294739396318 | 22.96643551429526 | 17.53312136858391 |
| C | 16.62952031109092 | 21.62466283385629 | 17.46821058151668 |
| N | 16.51074454262852 | 21.10443084851469 | 18.74218992135366 |
| C | 17.96977210628805 | 16.41348871920352 | 22.30883795267755 |
| C | 18.39629178632181 | 15.06720335100188 | 21.98733209848804 |
| C | 17.84808041536099 | 14.77609254097333 | 20.74323174476770 |
| C | 17.07502850773326 | 15.96237883365821 | 20.33389875577278 |
| N | 17.22861916818511 | 16.93330117982287 | 21.26643732150736 |
| C | 15.91758018817955 | 22.06652455026263 | 14.11632426567408 |
| H | 15.35709711922268 | 22.90625262648347 | 14.57229371996078 |
| H | 16.95026941906706 | 22.42513751073560 | 13.93828663200546 |
| H | 15.46350601902949 | 21.84531994823824 | 13.13384311942580 |
| C | 17.60291958521403 | 23.82431792159553 | 16.38377662429249 |
| H | 18.19679856574088 | 23.24668999722293 | 15.65001966260202 |
| H | 16.73855297120081 | 24.25404795760399 | 15.83948319202437 |
| H | 18.22174887285157 | 24.67077261873983 | 16.73133785554815 |
| C | 18.09472281209399 | 24.42481624587446 | 19.44014017437649 |
| H | 17.53769181243115 | 25.37807026729288 | 19.35422057851009 |
| H | 18.35396186034392 | 24.27138010125360 | 20.50140965555426 |
| H | 19.04604020399024 | 24.55337614809994 | 18.88733886778621 |
| C | 15.78335815603992 | 24.44611945150815 | 21.45747988780876 |
| H | 16.43415757566861 | 25.32480811874675 | 21.63268765370057 |
| H | 15.51071526114696 | 24.42631292349520 | 20.38861498932369 |
| H | 14.85219476882214 | 24.61544931470862 | 22.03319798724590 |
| C | 16.41008069048173 | 23.60272927661302 | 24.43691470252533 |
| H | 16.11036962777826 | 22.96921988778607 | 25.29534984903805 |
| H | 15.56661610701894 | 24.30325224316850 | 24.26899636698543 |
| C | 19.02411619076337 | 15.96488627184870 | 25.56573395730792 |
| H | 18.31782128645395 | 15.12053276808176 | 25.44216162489870 |
| H | 20.01053225792977 | 15.61504964172069 | 25.20366157533833 |
| H | 19.11720686297808 | 16.18003050909203 | 26.64516800759832 |
| C | 19.33919087620911 | 14.20479764581423 | 22.76760329709931 |
| H | 20.21970871234541 | 14.77811172838709 | 23.11451264605082 |
| H | 18.85750449716787 | 13.76942074307906 | 23.66564842925129 |
| H | 19.70333440725672 | 13.36106123987792 | 22.15432657508043 |
| C | 18.21227707477949 | 13.58886230949714 | 19.89464329393620 |
| H | 17.76272229815496 | 12.64562228707047 | 20.26162650149042 |
| H | 17.90550865624897 | 13.73041662615114 | 18.84463951868564 |
| H | 19.31090101250529 | 13.44653107702563 | 19.89813757578748 |
| C | 15.19962830710387 | 13.59112543338357 | 19.30813648269242 |
| H | 15.66725045384462 | 12.69952695307281 | 18.84673165650231 |
| H | 15.49219194723709 | 13.62315075731799 | 20.37098899469754 |
| H | 14.10371444886117 | 13.43793321129385 | 19.27150534969416 |
| C | 14.16432297284541 | 14.46555945091405 | 16.45466639811075 |
| H | 14.47676732250303 | 14.60282438785235 | 15.39811221698259 |
| H | 14.28575276701874 | 13.38525456616943 | 16.66618473702782 |
| C | 12.68295460358152 | 14.86797328657069 | 16.61122774722795 |
| H | 12.54315937835885 | 15.94002924088007 | 16.37419411629064 |
| H | 12.03236394499145 | 14.27203976451467 | 15.94223651916788 |
| H | 12.34639086122365 | 14.71436210236934 | 17.65433921511877 |
| C | 17.67655439428177 | 24.40799596987599 | 24.79538610852542 |
| H | 18.53148898146547 | 23.73035165823043 | 24.98345689241722 |
| H | 17.96111142850939 | 25.07681362031195 | 23.96046941723297 |
| H | 17.51543405036628 | 25.02784041927965 | 25.69865508288303 |

|    |                   |                   |                   |
|----|-------------------|-------------------|-------------------|
| H  | 15.09535465044329 | 19.28390656250764 | 13.63430274977192 |
| H  | 18.52839949432638 | 18.74050641601752 | 26.40691541799552 |
| Cl | 18.64874436967133 | 19.03225686159959 | 19.51592707653884 |
| Cl | 14.84369858750596 | 18.99918212159108 | 20.55954074339017 |
| Cu | 16.34550934753297 | 19.06236317930377 | 18.71447803449083 |
| Cu | 17.08741216652477 | 18.97182008727404 | 21.37670494909631 |
| H  | 14.79723942559097 | 16.81878058136045 | 15.14535018480412 |
| H  | 17.48125076806719 | 21.19474120712943 | 25.25842762592511 |

### Cu-Phenyl anchoring

|   |             |             |             |
|---|-------------|-------------|-------------|
| C | 15.97674776 | 20.9599963  | 19.40629575 |
| C | 15.65893654 | 18.0680421  | 29.87882828 |
| C | 15.99571971 | 20.80264747 | 20.85440641 |
| C | 15.46634368 | 18.97330089 | 28.74572564 |
| C | 14.98152834 | 21.08265088 | 27.53805502 |
| C | 14.49996455 | 22.45078897 | 27.5339743  |
| C | 15.29859501 | 21.85143787 | 25.49041973 |
| C | 14.68356047 | 22.9329777  | 26.25932452 |
| C | 15.63096784 | 19.71373424 | 18.89245047 |
| C | 16.12402048 | 17.03360103 | 27.91044865 |
| C | 15.46776044 | 18.81606511 | 20.0345636  |
| C | 15.44209083 | 15.95090536 | 23.2888698  |
| C | 15.02865361 | 16.70750104 | 21.25508098 |
| C | 14.60331632 | 15.32010157 | 21.27199607 |
| N | 15.40077438 | 20.72598034 | 26.26601455 |
| N | 15.76547429 | 18.30935885 | 27.61115837 |
| N | 15.69987313 | 19.51261311 | 21.16456041 |
| N | 15.47387577 | 17.08031896 | 22.51354079 |
| C | 15.06720368 | 20.30932181 | 28.70067529 |
| C | 15.07144685 | 17.47942693 | 20.09024494 |
| C | 14.85045725 | 14.84442057 | 22.53743044 |
| C | 16.08740851 | 16.85195526 | 29.35271488 |
| C | 15.75360889 | 21.9966493  | 24.15024924 |
| C | 16.32840862 | 23.22071565 | 23.58919763 |
| C | 16.53478308 | 22.99181266 | 22.24099553 |
| C | 16.11101381 | 21.63594618 | 21.99542694 |
| N | 15.70367691 | 21.04881437 | 23.17585812 |
| C | 16.28844249 | 16.21591708 | 26.76584737 |
| C | 16.79811174 | 14.89136419 | 26.51817991 |
| C | 16.57994489 | 14.64248399 | 25.17478212 |
| C | 15.92951851 | 15.83081013 | 24.61951384 |
| N | 15.83725807 | 16.77775778 | 25.59111717 |
| C | 16.28525613 | 22.18949841 | 18.615428   |
| H | 15.55653695 | 22.99194697 | 18.80778269 |
| H | 17.27874955 | 22.58705979 | 18.86197938 |
| H | 16.27165843 | 21.9728254  | 17.5402726  |
| C | 17.17135687 | 23.9435315  | 21.28094031 |
| H | 17.99109129 | 23.46948133 | 20.72279989 |
| H | 16.45110562 | 24.32767081 | 20.54283368 |
| H | 17.58414488 | 24.81115439 | 21.81187217 |
| C | 16.85555628 | 24.40107511 | 24.35159444 |
| H | 16.29645891 | 25.32610554 | 24.14536685 |
| H | 16.83218912 | 24.22246751 | 25.43244656 |
| H | 17.9043693  | 24.58784184 | 24.07461151 |
| C | 14.13409426 | 24.23061092 | 25.74474426 |
| H | 14.68421904 | 25.10496156 | 26.12316656 |
| H | 14.14080963 | 24.27029436 | 24.64971864 |



|    |             |             |             |
|----|-------------|-------------|-------------|
| H  | 13.08912922 | 24.34421451 | 26.07182877 |
| C  | 13.92983808 | 23.18673175 | 28.70657772 |
| H  | 13.38518411 | 22.49318284 | 29.36601048 |
| H  | 13.18329138 | 23.9135483  | 28.34795815 |
| C  | 16.30117704 | 15.58080626 | 30.10946137 |
| H  | 15.81926395 | 14.73535886 | 29.6001835  |
| H  | 17.36881105 | 15.33091348 | 30.21178764 |
| H  | 15.87978753 | 15.65626569 | 31.12038073 |
| C  | 17.53038923 | 14.00410479 | 27.47260678 |
| H  | 18.14848387 | 14.58453557 | 28.16966456 |
| H  | 16.84515016 | 13.38676509 | 28.07519325 |
| H  | 18.1900911  | 13.31238969 | 26.93041599 |
| C  | 17.14930208 | 13.48513224 | 24.41032526 |
| H  | 16.63361909 | 12.53739999 | 24.62683036 |
| H  | 17.11056925 | 13.65665921 | 23.32859075 |
| H  | 18.20751818 | 13.34379488 | 24.67996283 |
| C  | 14.37885647 | 13.52010187 | 23.0637719  |
| H  | 14.98241571 | 12.67896329 | 22.69072188 |
| H  | 14.39509627 | 13.48966519 | 24.15899979 |
| H  | 13.34213179 | 13.34041945 | 22.74311104 |
| C  | 13.92241085 | 14.60388234 | 20.14706594 |
| H  | 14.43599317 | 14.81964904 | 19.19549178 |
| H  | 14.01323046 | 13.51759028 | 20.29827269 |
| C  | 12.43584872 | 14.99034386 | 20.02396123 |
| H  | 12.32708341 | 16.06750034 | 19.83458623 |
| H  | 11.95207678 | 14.44306839 | 19.20217507 |
| H  | 11.89696483 | 14.76446863 | 20.95510907 |
| C  | 15.01223483 | 23.92896061 | 29.51431561 |
| H  | 15.76398752 | 23.22549863 | 29.89976953 |
| H  | 15.53562042 | 24.65950852 | 28.88092123 |
| H  | 14.57209948 | 24.46443631 | 30.36787257 |
| H  | 14.94250080 | 18.21344273 | 13.75444045 |
| H  | 14.71104671 | 19.31668722 | 35.04188937 |
| H  | 14.78405884 | 16.99243661 | 19.15863221 |
| H  | 14.81488946 | 20.80047549 | 29.63973247 |
| C  | 15.4509226  | 19.31786249 | 17.49453332 |
| C  | 16.05735926 | 18.14521101 | 16.99452338 |
| C  | 14.65226542 | 20.07873075 | 16.61525799 |
| C  | 15.87929381 | 17.75314208 | 15.67218474 |
| H  | 16.69741349 | 17.55613861 | 17.65322383 |
| C  | 14.47454464 | 19.69233733 | 15.29101901 |
| H  | 14.1448978  | 20.9676395  | 16.99251027 |
| C  | 15.08378805 | 18.5216684  | 14.80206161 |
| H  | 16.36388328 | 16.85347739 | 15.29153984 |
| H  | 13.85302409 | 20.28562605 | 14.61962666 |
| C  | 15.40583701 | 18.40412796 | 31.27976778 |
| C  | 14.21950218 | 19.06971224 | 31.65939191 |
| C  | 16.33229159 | 18.0725828  | 32.29036886 |
| C  | 13.972614   | 19.39419783 | 32.98833772 |
| H  | 13.47169278 | 19.30009313 | 30.89908473 |
| C  | 16.08684396 | 18.39028663 | 33.6221827  |
| H  | 17.26669274 | 17.58204209 | 32.01445411 |
| C  | 14.90563512 | 19.06171816 | 33.98851888 |
| H  | 13.0475446  | 19.89654572 | 33.27311241 |
| H  | 16.81102372 | 18.13213627 | 34.39551414 |
| Cu | 15.57057691 | 19.03127227 | 23.06310399 |
| Cu | 15.60158267 | 18.78956263 | 25.71408518 |

|    |             |             |             |
|----|-------------|-------------|-------------|
| Cl | 13.66596528 | 18.80988062 | 24.23677717 |
| Cl | 17.75080272 | 18.92582008 | 24.21234704 |

### **Cu-Ethynyl anchoring**

|   |             |             |             |
|---|-------------|-------------|-------------|
| C | 0.75129335  | 6.61618969  | 27.18535334 |
| C | -0.10692802 | 4.03400798  | 16.68288864 |
| C | 0.53422294  | 6.47060677  | 25.76419318 |
| C | 0.07409525  | 4.93564844  | 17.82722445 |
| C | 0.28938854  | 7.08953387  | 19.02867692 |
| C | 0.41464976  | 8.537865    | 19.02640256 |
| C | 0.17051233  | 7.72562509  | 21.13729863 |
| C | 0.35255269  | 8.94096426  | 20.33777667 |
| C | 0.10235441  | 2.86541851  | 18.62047368 |
| C | 1.56779467  | 4.61254019  | 26.39184035 |
| C | 1.72988949  | 1.87429621  | 23.03576007 |
| C | 2.22293726  | 2.64095931  | 25.04492149 |
| C | 2.91118402  | 1.36682931  | 24.91221656 |
| N | 0.21957498  | 6.62399531  | 20.33289497 |
| N | 0.18726298  | 4.19241517  | 18.93682497 |
| N | 1.03160238  | 5.26622201  | 25.35186897 |
| N | 1.57473999  | 2.95216273  | 23.85930042 |
| C | 0.17168264  | 6.32761671  | 17.86339427 |
| C | 2.18076932  | 3.36812899  | 26.23698444 |
| C | 2.6234295   | 0.89184411  | 23.65740782 |
| C | -0.0936246  | 2.72547285  | 17.1954492  |
| C | -0.07015993 | 7.73494095  | 22.54456917 |
| C | -0.82084589 | 8.77297656  | 23.25949007 |
| C | -0.72356953 | 8.482769    | 24.60698624 |
| C | 0.05512894  | 7.27149739  | 24.69765101 |
| N | 0.37557846  | 6.81504744  | 23.43838751 |
| C | 0.34016378  | 2.011309    | 19.72608333 |
| C | 0.18433422  | 0.59746088  | 19.97023751 |
| C | 0.64265919  | 0.38030227  | 21.25578646 |
| C | 1.09308889  | 1.67703196  | 21.7730488  |
| N | 0.82815556  | 2.6383502   | 20.85114532 |
| C | 0.43293614  | 7.76696629  | 28.07598485 |
| H | 0.74109889  | 8.71967406  | 27.62376401 |
| H | -0.64611179 | 7.83815654  | 28.28134417 |
| H | 0.94884387  | 7.6490635   | 29.03814584 |
| C | -1.40954013 | 9.20686952  | 25.71970492 |
| H | -1.82316626 | 8.50934845  | 26.45959651 |
| H | -0.72718849 | 9.88690865  | 26.25370338 |
| H | -2.2355091  | 9.81968756  | 25.33394432 |
| C | -1.74182293 | 9.79690189  | 22.66574423 |
| H | -1.40685745 | 10.8284769  | 22.85089602 |
| H | -1.85440922 | 9.66168959  | 21.58413151 |
| H | -2.74441585 | 9.69972713  | 23.11095325 |
| C | 0.64724807  | 10.32694823 | 20.82961971 |
| H | -0.15182918 | 11.04300271 | 20.58641543 |
| H | 0.80825462  | 10.34794649 | 21.91340789 |
| H | 1.56728626  | 10.69908347 | 20.35336096 |
| C | 0.57007426  | 9.40719505  | 17.81810457 |
| H | 1.12146855  | 8.87280311  | 17.02942585 |
| H | 1.1841905   | 10.28311295 | 18.08199509 |
| C | -0.19891168 | 1.48845568  | 16.37273522 |
| H | 0.58831002  | 0.76709442  | 16.63206342 |
| H | -1.16513337 | 0.98230298  | 16.51869821 |

|    |             |             |              |
|----|-------------|-------------|--------------|
| H  | -0.11055823 | 1.73965302  | 15.30741745  |
| C  | -0.46507062 | -0.41126914 | 19.07933019  |
| H  | -1.35735308 | -0.00041348 | 18.58803084  |
| H  | 0.21441823  | -0.76142614 | 18.28680328  |
| H  | -0.77321615 | -1.29630569 | 19.6519713   |
| C  | 0.4548792   | -0.88921165 | 22.03159653  |
| H  | 1.13820659  | -1.68991769 | 21.71147012  |
| H  | 0.59297446  | -0.73060963 | 23.10691208  |
| H  | -0.57011616 | -1.26433846 | 21.88914211  |
| C  | 3.2974341   | -0.28165851 | 23.00863364  |
| H  | 2.94967559  | -1.2443188  | 23.41210785  |
| H  | 3.14454531  | -0.29094377 | 21.92363927  |
| H  | 4.38155291  | -0.23030483 | 23.18770168  |
| C  | 3.85456853  | 0.77607044  | 25.91349446  |
| H  | 3.43544686  | 0.86912832  | 26.92864536  |
| H  | 3.9542992   | -0.30361304 | 25.72486441  |
| C  | 5.24393598  | 1.44198223  | 25.87101426  |
| H  | 5.16900121  | 2.51496258  | 26.09574207  |
| H  | 5.92408393  | 0.98168745  | 26.60178621  |
| H  | 5.69184302  | 1.34461364  | 24.87181112  |
| C  | -0.78722339 | 9.88729902  | 17.26705392  |
| H  | -1.41446747 | 9.03330698  | 16.97479316  |
| H  | -1.3356674  | 10.45847568 | 18.02970318  |
| H  | -0.64998669 | 10.53033841 | 16.38593498  |
| Cl | -1.20117986 | 4.34979832  | 22.44135937  |
| Cl | 2.67671619  | 5.15965748  | 21.80568861  |
| Cu | 0.95467238  | 4.8466769   | 23.44216019  |
| Cu | 0.56166664  | 4.67080568  | 20.79667994  |
| H  | 2.6479051   | 2.92840787  | 27.11886343  |
| H  | 0.13660875  | 6.85440915  | 16.90934088  |
| C  | 1.4107964   | 5.4433295   | 27.59174368  |
| C  | 1.85621525  | 5.11161768  | 28.86716751  |
| C  | -0.24027846 | 4.43185726  | 15.35659746  |
| C  | 2.27181646  | 4.77843494  | 29.98337807  |
| C  | -0.36063482 | 4.83780206  | 14.19447969  |
| H  | 2.62664095  | 4.49838239  | 30.965950836 |
| H  | -0.46567718 | 5.17483082  | 13.172152653 |

### Zn-Amethyrin systems

#### Zn-Ethyl anchoring

|   |             |             |             |
|---|-------------|-------------|-------------|
| C | 16.84317315 | 17.25356942 | 25.81516991 |
| C | 13.71451224 | 16.27703999 | 16.03675578 |
| C | 16.12112608 | 17.2369368  | 24.57889432 |
| C | 13.85875381 | 16.99581072 | 17.27166682 |
| C | 13.86805668 | 19.15529233 | 18.63119944 |
| C | 13.71104302 | 20.57959086 | 18.75729341 |
| C | 14.15543679 | 19.65962315 | 20.78501965 |
| C | 13.88906845 | 20.89443963 | 20.10692089 |
| C | 17.42464106 | 15.98826148 | 25.95229522 |
| C | 14.1481984  | 14.83064245 | 17.72745246 |
| C | 17.04562463 | 15.21639406 | 24.80226074 |
| C | 16.09199599 | 12.40154164 | 21.52409173 |
| C | 17.0253513  | 13.05268177 | 23.44438315 |
| C | 17.39113375 | 11.67612589 | 23.23980703 |
| N | 14.14648434 | 18.63464098 | 19.89295661 |
| N | 14.1236287  | 16.07403553 | 18.27989024 |
| N | 16.25725607 | 16.0205246  | 23.98552017 |

|   |             |             |             |
|---|-------------|-------------|-------------|
| N | 16.23327945 | 13.45498225 | 22.37055561 |
| C | 13.74134846 | 18.38381123 | 17.46629492 |
| C | 17.36848887 | 13.87377499 | 24.52951071 |
| C | 16.81281291 | 11.27180342 | 22.03496419 |
| C | 13.90552231 | 14.92134709 | 16.31937767 |
| C | 14.42709039 | 19.41219742 | 22.19141678 |
| C | 13.80538319 | 19.87753005 | 23.36168313 |
| C | 14.37444717 | 19.17049148 | 24.46230625 |
| C | 15.33641141 | 18.28605562 | 23.9478495  |
| N | 15.33753942 | 18.44688591 | 22.57609245 |
| H | 16.03260155 | 18.03529546 | 21.95137929 |
| C | 14.40879088 | 13.65867202 | 18.54677225 |
| C | 13.79099191 | 12.39895184 | 18.60484761 |
| C | 14.35642354 | 11.69195778 | 19.70757685 |
| C | 15.31165417 | 12.53089546 | 20.30505463 |
| N | 15.31186052 | 13.71283138 | 19.58927904 |
| H | 16.0131891  | 14.44704558 | 19.6994452  |
| C | 17.02075737 | 18.43026397 | 26.72412729 |
| H | 16.78603924 | 19.36596159 | 26.19922123 |
| H | 16.36969623 | 18.3795111  | 27.61138214 |
| H | 18.05662467 | 18.49659656 | 27.08929968 |
| C | 18.25069326 | 15.50456732 | 27.10257416 |
| H | 19.01147499 | 14.78356616 | 26.76532017 |
| H | 18.79322279 | 16.34519971 | 27.56231592 |
| C | 13.9049755  | 19.24708739 | 25.88124037 |
| H | 14.22243508 | 18.36431669 | 26.45058612 |
| H | 14.28891115 | 20.13970726 | 26.40086979 |
| H | 12.80647432 | 19.2976486  | 25.92903332 |
| C | 12.64582272 | 20.82033729 | 23.43936937 |
| H | 12.94846707 | 21.82665294 | 23.77118065 |
| H | 12.15472816 | 20.92392829 | 22.46367476 |
| H | 11.89307594 | 20.46033061 | 24.15701266 |
| C | 13.90693478 | 22.26310136 | 20.71437033 |
| H | 12.89379028 | 22.65671568 | 20.89360581 |
| H | 14.4340676  | 22.25812254 | 21.67758316 |
| H | 14.41574721 | 22.98030127 | 20.05251966 |
| C | 13.38002645 | 21.53492472 | 17.65281775 |
| H | 13.81996482 | 21.18831433 | 16.70450087 |
| H | 13.8442872  | 22.51172715 | 17.86424299 |
| C | 13.51211756 | 16.89087238 | 14.68569994 |
| H | 13.06723724 | 16.15758673 | 13.99666636 |
| H | 12.81071406 | 17.73856865 | 14.74226972 |
| C | 13.95023197 | 13.79358191 | 15.3346808  |
| H | 14.50501076 | 12.94023949 | 15.74749561 |
| H | 12.945033   | 13.43193144 | 15.06504193 |
| H | 14.44536546 | 14.09975027 | 14.40144392 |
| C | 12.63950558 | 11.93575576 | 17.76832983 |
| H | 12.12412897 | 12.78550676 | 17.30218374 |
| H | 12.95647367 | 11.25430861 | 16.96241491 |
| H | 11.90327444 | 11.39048425 | 18.37810902 |
| C | 13.88833833 | 10.3669001  | 20.22258962 |
| H | 14.29502911 | 9.52500242  | 19.63957062 |
| H | 14.18267824 | 10.22311823 | 21.26982201 |
| H | 12.7915708  | 10.29154511 | 20.16975739 |
| C | 16.99479398 | 9.9505981   | 21.35171496 |
| H | 16.35492782 | 9.1639849   | 21.7828669  |
| H | 16.74882846 | 10.02587562 | 20.28413703 |

|    |             |             |               |
|----|-------------|-------------|---------------|
| H  | 18.03485381 | 9.602863    | 21.43500552   |
| C  | 18.30629356 | 10.86766538 | 24.10843047   |
| H  | 18.11796705 | 11.09600764 | 25.16994419   |
| H  | 18.07778821 | 9.79794898  | 23.98289353   |
| C  | 19.79286834 | 11.11893431 | 23.78959105   |
| H  | 20.04699503 | 12.17804024 | 23.93918689   |
| H  | 20.44559781 | 10.51178635 | 24.43356398   |
| H  | 20.01417252 | 10.87075336 | 22.74157771   |
| C  | 14.86234151 | 17.38284862 | 14.11822077   |
| H  | 15.52785238 | 16.55197768 | 14.01029134   |
| H  | 15.2911716  | 18.09864249 | 14.78802963   |
| C  | 11.86076622 | 21.72315268 | 17.47792248   |
| H  | 11.37773035 | 20.76546634 | 17.23683675   |
| H  | 11.40700433 | 22.09979864 | 18.40580099   |
| H  | 11.63860952 | 22.43623469 | 16.67069074   |
| C  | 17.34658431 | 14.83897799 | 28.16424104   |
| H  | 16.82990267 | 14.01154142 | 27.7245948    |
| H  | 16.63552645 | 15.55246687 | 28.52511545   |
| Zn | 15.55747032 | 15.26941871 | 22.34318151   |
| Zn | 14.38620248 | 16.72045181 | 20.0948114    |
| Cl | 13.34705661 | 15.6255264  | 21.82382247   |
| Cl | 16.74638303 | 16.40270733 | 20.55412595   |
| H  | 17.97629517 | 13.38643942 | 25.29611153   |
| H  | 13.49950888 | 18.95305454 | 16.56534557   |
| H  | 17.93714883 | 14.46569895 | 29.0281722246 |
| H  | 14.73801642 | 17.86216661 | 13.1235689854 |

### Zn-Direct anchoring

|   |                   |                   |                   |
|---|-------------------|-------------------|-------------------|
| C | 16.14041596083101 | 20.41673894076849 | 15.14500385914761 |
| C | 17.43726785053728 | 18.80776183462638 | 25.28421642014553 |
| C | 16.60390824767322 | 20.36159790936232 | 16.50754857102234 |
| C | 17.39513515606289 | 19.63931149648345 | 24.11560459706707 |
| C | 17.23616427885785 | 21.92652033551284 | 22.96148558623267 |
| C | 17.13212278641135 | 23.36865736136595 | 22.97840698028764 |
| C | 17.28869012695362 | 22.61344005676652 | 20.83362790411604 |
| C | 17.17072256302093 | 23.79830810113754 | 21.64157345308794 |
| C | 15.83277186464577 | 19.09718600808478 | 14.79149346275888 |
| C | 17.61736263437167 | 17.52014772951875 | 23.42693557565192 |
| C | 16.10435039606694 | 18.26021468228373 | 15.92475594341585 |
| C | 16.87793508074590 | 15.27389661237940 | 19.11029850580419 |
| C | 16.22867629260210 | 15.97996794328855 | 17.09004906157562 |
| C | 16.06598173395250 | 14.54476147858581 | 17.11068590630379 |
| N | 17.32343263928521 | 21.51342840302675 | 21.63202735877885 |
| N | 17.50708605923113 | 18.81039897204768 | 23.00133840317948 |
| N | 16.57116064350236 | 19.07501866038238 | 16.95301458196487 |
| N | 16.72420746446232 | 16.37885446104469 | 18.33171163115196 |
| C | 17.27423210598752 | 21.04916991076339 | 24.06481596361119 |
| C | 15.96246343212817 | 16.85560757497158 | 16.01816065166446 |
| C | 16.46852162632140 | 14.10295321922363 | 18.38011982397866 |
| C | 17.57424374152825 | 17.47868635847353 | 24.86612671257918 |
| C | 17.35735570055863 | 22.48370626533218 | 19.38407836910079 |
| C | 18.10518513703916 | 23.19007802098876 | 18.41748067145351 |
| C | 17.90913529872419 | 22.53338882101203 | 17.15954556158709 |
| C | 17.04544359122763 | 21.43992352397999 | 17.38341231769369 |
| N | 16.73598743201159 | 21.43486128779074 | 18.73092348104984 |
| H | 16.04113214462509 | 20.81636235092663 | 19.16161754282068 |
| C | 17.72638083555671 | 16.42434550037768 | 22.47087606670146 |



|    |                   |                   |                   |
|----|-------------------|-------------------|-------------------|
| C  | 18.54819451590056 | 15.27502845834353 | 22.44270818067399 |
| C  | 18.32886284529272 | 14.62187595615233 | 21.18690905095422 |
| C  | 17.37727980897525 | 15.38392376904253 | 20.47407627787716 |
| N  | 17.03956408019572 | 16.46151988122810 | 21.27175461647143 |
| H  | 16.28000684216732 | 17.11797787916097 | 21.06338584753343 |
| C  | 15.94561187265698 | 21.65908245120248 | 14.32437500464675 |
| H  | 15.80809278438040 | 22.54132358395521 | 14.97760825710978 |
| H  | 16.81445240065835 | 21.87129732722824 | 13.66846577852793 |
| H  | 15.05676013625804 | 21.56743126915295 | 13.67236496953216 |
| C  | 18.61932972446334 | 22.85268940003156 | 15.87747683728850 |
| H  | 18.6669993092662  | 21.96592169285553 | 15.22014720174813 |
| H  | 18.12194988770723 | 23.66659360110345 | 15.31103739977948 |
| H  | 19.65794136717240 | 23.18395114388785 | 16.07112836446490 |
| C  | 19.06010872998922 | 24.31582562698175 | 18.68522595004836 |
| H  | 18.63428770131967 | 25.30336007203373 | 18.41309956624697 |
| H  | 19.34115431103685 | 24.35189234215836 | 19.75290646714087 |
| H  | 19.99041813646499 | 24.19508512316088 | 18.09643262715622 |
| C  | 17.01181846012975 | 25.20273117806205 | 21.13763741036642 |
| H  | 17.96066119596843 | 25.77561654145573 | 21.17383846673325 |
| H  | 16.66466964582918 | 25.20556746602343 | 20.08811803300221 |
| H  | 16.27481941653080 | 25.76201389827012 | 21.74587788866452 |
| C  | 17.05664400523274 | 24.24398665892549 | 24.19549904851327 |
| H  | 16.58215257913828 | 23.69461378431307 | 25.03325727113059 |
| H  | 16.39385472494065 | 25.10919640981321 | 23.98635723085371 |
| C  | 17.57245482786242 | 16.24408754076632 | 25.72094767019691 |
| H  | 17.16462791876175 | 15.38071106840603 | 25.16203516296014 |
| H  | 18.59068650297329 | 15.96235302824751 | 26.05776627076901 |
| H  | 16.95625596169761 | 16.39414534799174 | 26.62696647536488 |
| C  | 19.58445370089672 | 14.90306507325250 | 23.46183274510697 |
| H  | 19.89964059502203 | 15.78692390425068 | 24.04533238020061 |
| H  | 19.21936370393419 | 14.13901589651601 | 24.17841772990472 |
| H  | 20.48598873138259 | 14.48260430437418 | 22.97568701451111 |
| C  | 19.09387283724247 | 13.44441489106955 | 20.65829665605643 |
| H  | 18.67921463278578 | 12.47820641144788 | 21.01193586403280 |
| H  | 19.08262421772763 | 13.42989911734484 | 19.55349229109310 |
| H  | 20.15139835622616 | 13.47943617396084 | 20.98462943045273 |
| C  | 16.37816152947086 | 12.70500655879321 | 18.92041172213728 |
| H  | 17.24969869297238 | 12.08118657617777 | 18.63479973223674 |
| H  | 16.33079145368108 | 12.71606469780465 | 20.02484527636730 |
| H  | 15.47319643918110 | 12.19134165241540 | 18.54421371764690 |
| C  | 15.45681314049816 | 13.71075856864411 | 16.02014926432818 |
| H  | 15.77383066755096 | 14.09337729910690 | 15.02831645773684 |
| H  | 15.84872182325196 | 12.67625927832894 | 16.08571459148907 |
| C  | 13.91573893208911 | 13.68832616328665 | 16.09434846152998 |
| H  | 13.50685676326411 | 14.71271758607201 | 16.00038057936247 |
| H  | 13.48331260191576 | 13.06256453449878 | 15.28946143481070 |
| H  | 13.57761655076655 | 13.28533995017650 | 17.06838133472299 |
| C  | 18.44356573633005 | 24.75947010467275 | 24.63171330101690 |
| H  | 19.11188723301933 | 23.91349370559314 | 24.88272622784997 |
| H  | 18.92210089872842 | 25.33119375094745 | 23.81356890667787 |
| H  | 18.36598448596576 | 25.41999402129561 | 25.51715935073745 |
| H  | 15.42737491258739 | 18.75405059206525 | 13.83289212418819 |
| H  | 17.34599083760029 | 19.16168962315878 | 26.31746860170758 |
| Zn | 17.06323390223529 | 18.26112667387720 | 18.64293771279815 |
| Zn | 17.49016186189916 | 19.62307164304958 | 21.24127810203067 |
| Cl | 19.02829474694680 | 18.91505302472255 | 19.66861945843214 |
| Cl | 15.36208127716680 | 18.97495317773365 | 20.23810581311869 |

|   |                   |                   |                   |
|---|-------------------|-------------------|-------------------|
| H | 15.59689478674965 | 16.37132200623755 | 15.10167947766917 |
| H | 17.20895168735838 | 21.53392914166472 | 25.04875904335831 |

### Zn-Phenyl anchoring

|   |             |             |             |
|---|-------------|-------------|-------------|
| C | 19.93695353 | 17.19851525 | 28.22079003 |
| C | 19.35080095 | 18.9891186  | 18.07880975 |
| C | 20.15862132 | 17.26086451 | 26.8136335  |
| C | 19.48132567 | 18.13577744 | 19.23468832 |
| C | 19.51110741 | 15.83926616 | 20.35168473 |
| C | 19.39558137 | 14.40381676 | 20.31420994 |
| C | 19.93733186 | 15.09134704 | 22.4101841  |
| C | 19.66391434 | 13.93652163 | 21.60205017 |
| C | 19.85530351 | 18.53078567 | 28.66969395 |
| C | 19.98188163 | 20.21528975 | 19.88143871 |
| C | 19.98703716 | 19.37558397 | 27.50897527 |
| C | 20.27378013 | 22.38265371 | 24.27673413 |
| C | 19.9910553  | 21.65953212 | 26.36788904 |
| C | 19.91034312 | 23.09773365 | 26.40121403 |
| N | 19.83289163 | 16.21438728 | 21.65437254 |
| N | 19.86031361 | 18.92588878 | 20.30886486 |
| N | 20.16834779 | 18.55996615 | 26.40302565 |
| N | 20.21200325 | 21.26745284 | 25.0486698  |
| C | 19.3653211  | 16.73067225 | 19.28071068 |
| C | 19.89489356 | 20.78204938 | 27.45489968 |
| C | 20.08480274 | 23.54887058 | 25.09328651 |
| C | 19.67802433 | 20.29541025 | 18.49009286 |
| C | 20.28015768 | 15.17816446 | 23.81814562 |
| C | 21.19301943 | 14.45455038 | 24.60270312 |
| C | 21.26343767 | 15.08909334 | 25.87814751 |
| C | 20.38797061 | 16.18604186 | 25.85524976 |
| N | 19.82024043 | 16.22320267 | 24.59810823 |
| H | 19.05621625 | 16.8455598  | 24.3314209  |
| C | 20.35233105 | 21.27054738 | 20.80883744 |
| C | 21.2459619  | 22.34863229 | 20.6917723  |
| C | 21.32502975 | 22.98376562 | 21.9660054  |
| C | 20.4823962  | 22.28085941 | 22.84336929 |
| N | 19.91877112 | 21.24750993 | 22.11951036 |
| H | 19.14570942 | 20.6722694  | 22.4578671  |
| C | 19.79179561 | 15.94840465 | 29.03386995 |
| H | 19.97741639 | 15.05913253 | 28.42031232 |
| H | 20.48775183 | 15.93391225 | 29.88645575 |
| H | 18.77717381 | 15.85104389 | 29.44729373 |
| C | 22.22416376 | 14.73821523 | 26.97105414 |
| H | 22.2925937  | 15.54436391 | 27.71289313 |
| H | 21.93670987 | 13.81537971 | 27.500354   |
| H | 23.23410229 | 14.57084491 | 26.56574077 |
| C | 22.06359241 | 13.32686207 | 24.14480086 |
| H | 21.70894352 | 12.35113557 | 24.51415653 |
| H | 22.1011682  | 13.27657814 | 23.04938093 |
| H | 23.09413165 | 13.45212952 | 24.51014986 |
| C | 19.57916941 | 12.52032908 | 22.08076285 |
| H | 20.48539856 | 11.9408865  | 21.84355067 |
| H | 19.43946465 | 12.48229641 | 23.16938039 |
| H | 18.73317691 | 11.99676584 | 21.61056127 |
| C | 19.08022556 | 13.57410619 | 19.10862604 |
| H | 18.42579059 | 14.13445779 | 18.42254696 |
| H | 18.5082347  | 12.68416679 | 19.41756337 |

|    |             |             |              |
|----|-------------|-------------|--------------|
| C  | 19.55965465 | 21.55516939 | 17.6890721   |
| H  | 19.35107453 | 22.41075802 | 18.34641491  |
| H  | 20.47921414 | 21.79260665 | 17.13141766  |
| H  | 18.74810611 | 21.47323521 | 16.95200888  |
| C  | 22.08805794 | 22.67825862 | 19.49939047  |
| H  | 22.18770567 | 21.8093936  | 18.83588753  |
| H  | 21.66691635 | 23.50551193 | 18.90569806  |
| H  | 23.09947366 | 22.9846653  | 19.80547666  |
| C  | 22.26353923 | 24.09136053 | 22.32927559  |
| H  | 21.90174515 | 25.07293546 | 21.9834294   |
| H  | 22.40745715 | 24.14996821 | 23.41538461  |
| H  | 23.25164773 | 23.93524994 | 21.87019574  |
| C  | 19.98703068 | 24.96421049 | 24.61143718  |
| H  | 20.90621129 | 25.53791551 | 24.81132135  |
| H  | 19.80699598 | 24.99734282 | 23.52880045  |
| H  | 19.16089744 | 25.49404055 | 25.10765142  |
| C  | 19.60158324 | 23.9341068  | 27.60525183  |
| H  | 20.11138219 | 23.52053737 | 28.49048454  |
| H  | 20.01149244 | 24.94580545 | 27.46209521  |
| C  | 18.08894153 | 24.02310239 | 27.8857864   |
| H  | 17.6684464  | 23.02299722 | 28.06334293  |
| H  | 17.88575398 | 24.64524307 | 28.76938645  |
| H  | 17.55795798 | 24.45906299 | 27.02730315  |
| C  | 20.34956245 | 13.12683976 | 18.35855003  |
| H  | 20.9208656  | 13.99922464 | 18.0107959   |
| H  | 21.00456179 | 12.54088997 | 19.01909284  |
| H  | 20.09711665 | 12.50808969 | 17.48527078  |
| H  | 19.24737584 | 20.30997028 | 33.73337044  |
| H  | 17.79180999 | 17.44760669 | 13.146116301 |
| H  | 19.7195519  | 21.26227885 | 28.41990872  |
| H  | 19.15279487 | 16.26221615 | 18.31778404  |
| C  | 19.69102307 | 18.99970194 | 30.04801171  |
| C  | 20.53411164 | 20.00533462 | 30.57077544  |
| C  | 18.69596112 | 18.46817189 | 30.89480838  |
| C  | 20.38016672 | 20.46999727 | 31.87260062  |
| H  | 21.33865929 | 20.39834475 | 29.94727629  |
| C  | 18.53710387 | 18.92973532 | 32.19674938  |
| H  | 18.01847235 | 17.70594257 | 30.50981927  |
| C  | 19.37286174 | 19.9436163  | 32.70216853  |
| H  | 21.04499624 | 21.23837169 | 32.26865877  |
| H  | 17.75602551 | 18.51961608 | 32.83779435  |
| C  | 18.91836712 | 18.57472028 | 16.74539284  |
| C  | 17.81939455 | 17.70671294 | 16.56456328  |
| C  | 19.58622568 | 19.04211635 | 15.59197242  |
| C  | 17.41642757 | 17.31101839 | 15.29292586  |
| H  | 17.25407406 | 17.37593197 | 17.43713233  |
| C  | 19.19476311 | 18.6413016  | 14.32083664  |
| H  | 20.44632663 | 19.70239105 | 15.70815016  |
| C  | 18.10669965 | 17.76286741 | 14.15290782  |
| H  | 16.55343016 | 16.65656867 | 15.16549209  |
| H  | 19.73026135 | 18.99421822 | 13.43884107  |
| Zn | 20.15014186 | 18.08558075 | 22.03449874  |
| Zn | 20.35386299 | 19.37500437 | 24.65243735  |
| Cl | 18.46949414 | 18.85896587 | 23.59506467  |
| Cl | 22.0179299  | 18.64961329 | 23.24988113  |

## Zn-Ethynyl anchoring

|   |             |             |             |
|---|-------------|-------------|-------------|
| C | 3.88619157  | 4.92307621  | 0.08255069  |
| C | -2.68314039 | -2.82037107 | -1.6400025  |
| C | 2.86569936  | 3.94282567  | 0.15955882  |
| C | -2.35123073 | -1.46489708 | -1.26959613 |
| C | -2.98212119 | 0.96994587  | -0.87449687 |
| C | -3.93431549 | 2.05408261  | -0.83789966 |
| C | -1.89195892 | 2.77842544  | -0.15438677 |
| C | -3.25512959 | 3.18155497  | -0.3817232  |
| C | 5.07643037  | 4.22534426  | -0.22516725 |
| C | -0.48717193 | -2.6942952  | -1.10839255 |
| C | 4.74493835  | 2.82260888  | -0.31802701 |
| C | 4.26967259  | -1.54848464 | -0.69150481 |
| C | 5.38802818  | 0.38290669  | -0.6632792  |
| C | 6.35589153  | -0.66655041 | -0.87574348 |
| N | -1.74659297 | 1.46297902  | -0.45558252 |
| N | -1.01309606 | -1.43625616 | -0.94267352 |
| N | 3.38870594  | 2.70025368  | -0.10496728 |
| N | 4.12685516  | -0.20425692 | -0.56403473 |
| C | -3.22615734 | -0.35888538 | -1.2297887  |
| C | 5.63585046  | 1.7534177   | -0.55029323 |
| C | 5.65737004  | -1.87039206 | -0.90160595 |
| C | -1.49641526 | -3.58485652 | -1.55350625 |
| C | -0.75971376 | 3.56531568  | 0.29213053  |
| C | -0.61792186 | 4.50684528  | 1.32713469  |
| C | 0.76580454  | 4.83308277  | 1.42618381  |
| C | 1.44805884  | 4.09209261  | 0.44670848  |
| N | 0.50711637  | 3.32539055  | -0.20896167 |
| H | 0.689479    | 2.80965155  | -1.07145168 |
| C | 0.91297322  | -2.94949454 | -0.80907271 |
| C | 1.53506984  | -3.98684001 | -0.09411383 |
| C | 2.91719658  | -3.6605483  | 0.02262139  |
| C | 3.11918705  | -2.42619585 | -0.62147946 |
| N | 1.88691981  | -2.01765097 | -1.10084632 |
| H | 1.75623357  | -1.23959335 | -1.74945043 |
| C | 3.75540576  | 6.40021678  | 0.22813017  |
| H | 2.70680388  | 6.71599568  | 0.15680366  |
| H | 4.15516607  | 6.74624872  | 1.19650799  |
| H | 4.34460362  | 6.91120604  | -0.54764942 |
| C | 1.38607457  | 5.68470765  | 2.4887396   |
| H | 2.46773932  | 5.51261292  | 2.5519529   |
| H | 1.22592092  | 6.75934544  | 2.30688827  |
| H | 0.95236155  | 5.45932324  | 3.47516031  |
| C | -1.68490051 | 4.96327214  | 2.2716627   |
| H | -2.0349485  | 5.98213994  | 2.04050339  |
| H | -2.55455095 | 4.29530463  | 2.24181632  |
| H | -1.31120786 | 4.98124673  | 3.30648092  |
| C | -3.8005372  | 4.57048048  | -0.26038776 |
| H | -4.36242507 | 4.71950525  | 0.67503026  |
| H | -2.99273795 | 5.31370436  | -0.28272546 |
| H | -4.49154834 | 4.79347587  | -1.08700394 |
| C | -5.38616293 | 1.96113235  | -1.18910742 |
| H | -5.53635793 | 1.21619187  | -1.98555376 |
| H | -5.7235294  | 2.92531779  | -1.60213594 |
| C | -1.33603469 | -5.00530268 | -1.97809095 |
| H | -0.27609915 | -5.27988647 | -2.04777826 |
| H | -1.83047018 | -5.70010435 | -1.28162147 |

|    |             |             |               |
|----|-------------|-------------|---------------|
| H  | -1.80903982 | -5.16088778 | -2.96121743   |
| C  | 0.85153923  | -5.14557611 | 0.5612045     |
| H  | -0.22803505 | -4.96874319 | 0.64859454    |
| H  | 0.99091571  | -6.08281213 | -0.00086987   |
| H  | 1.24868317  | -5.31676259 | 1.57325202    |
| C  | 3.91698612  | -4.41914928 | 0.83742806    |
| H  | 4.32334879  | -5.28726542 | 0.29423904    |
| H  | 4.75993702  | -3.78102708 | 1.13018418    |
| H  | 3.45596266  | -4.80607783 | 1.7584876     |
| C  | 6.21766018  | -3.22643832 | -1.2054798    |
| H  | 6.66254072  | -3.70511198 | -0.31867305   |
| H  | 5.43316378  | -3.89695833 | -1.58081248   |
| H  | 7.0043018   | -3.16476557 | -1.9709333    |
| C  | 7.81962276  | -0.46914684 | -1.12552313   |
| H  | 8.206679    | 0.32464462  | -0.46705241   |
| H  | 8.36369408  | -1.38608132 | -0.85195253   |
| C  | 8.12020638  | -0.10514942 | -2.59270839   |
| H  | 7.60918878  | 0.82670187  | -2.87309585   |
| H  | 9.19939695  | 0.03144984  | -2.75252407   |
| H  | 7.76823087  | -0.89556362 | -3.27122347   |
| C  | -6.25730252 | 1.59691093  | 0.02892018    |
| H  | -5.96203733 | 0.6201115   | 0.4373143     |
| H  | -6.14037912 | 2.34320547  | 0.82771978    |
| H  | -7.32076895 | 1.54910181  | -0.24610891   |
| Zn | 2.5993197   | 0.92912792  | -0.19621765   |
| Zn | -0.23570899 | 0.24951564  | -0.37363115   |
| Cl | 1.1394375   | 0.28924719  | 1.4626199     |
| Cl | 1.22789861  | 0.91491938  | -2.18986552   |
| H  | 6.68070915  | 2.06433601  | -0.63349727   |
| H  | -4.25103163 | -0.6020247  | -1.52234598   |
| C  | 6.47116504  | 4.84699345  | -0.42483573   |
| C  | 7.55905808  | 5.33187981  | -0.58057714   |
| C  | -4.07333403 | -3.33830261 | -2.05317143   |
| C  | -5.15768507 | -3.74228921 | -2.3754432    |
| H  | -6.13255783 | -4.11119373 | -2.6628348033 |
| H  | 8.53647825  | 5.772523671 | -0.7203676503 |
